# Supplementary material for: New ATP-competitive inhibitors of E. coli GyrB obtained from the mapping of the hydrophobic floor at the binding site: synthesis and biological evaluation
Source: Royal Society of Chemistry journal article supplement (doi:10.1039/d4md00498a), 2024-01-01
Supplement: d4md00498a1.pdf [file d4md00498a1.pdf]

**New ATP-competitive inhibitors of *E. coli* GyrB  
obtained from the mapping of hydrophobic floor at the  
binding site. Synthesis and biological evaluation.**

Lucas Gutierrez,\*<sup>1</sup> Peter Peršolja<sup>2</sup>, Rodrigo Tosso<sup>1</sup>, Nace Zidar\*<sup>2</sup>, Danijel Kikelj<sup>2</sup>, Ricardo D. Enriz,<sup>1</sup>

---

<sup>1</sup> *Facultad de Química, Bioquímica y Farmacia, Universidad Nacional de San Luis; Instituto Multidisciplinario de Investigaciones Biológicas (IMIBIO-SL). Ejército de los Andes 950, (5700) San Luis, Argentina.*

<sup>2</sup> *University of Ljubljana, Faculty of Pharmacy, Aškerčeva cesta 7, 1000 Ljubljana, Slovenia*

**Supplementary  
Information**

**Table 1. Different conformations obtained for complexes of compounds 3, 2, and 4.**

| <i>Compound</i> | <i>Conformation</i> | $\phi$ (degrees) | $\psi$ (degrees) | <i>Relative energy (kcal/mol)</i> |
|-----------------|---------------------|------------------|------------------|-----------------------------------|
| <b>3</b>        | A                   | 90.79            | -66.78           | 0.00                              |
|                 | B                   | 90.79            | -126.78          | 0.31                              |
|                 | C                   | 90.79            | -141.78          | 0.70                              |
|                 | D                   | 90.79            | 38.22            | 5.53                              |
|                 | E                   | -74.21           | -6.78            | 5.95                              |
|                 | F                   | -74.21           | 83.22            | 5.96                              |
|                 | G                   | -74.21           | 8.22             | 6.07                              |
|                 | H                   | -74.21           | -111.78          | 9.14                              |
| <b>2</b>        | A                   | 119.94           | 48.83            | 0.00                              |
|                 | B                   | 119.94           | 108.83           | 0.93                              |
|                 | C                   | 134.94           | -146.17          | 2.99                              |
|                 | D                   | 134.94           | 33.83            | 3.07                              |
|                 | E                   | 134.94           | -86.17           | 4.35                              |
|                 | F                   | 134.94           | 168.83           | 4.96                              |
|                 | G                   | 179.94           | 63.83            | 7.61                              |
|                 | H                   | -135.06          | -131.17          | 7.92                              |
|                 | I                   | -135.06          | 33.83            | 7.93                              |
| <b>4</b>        | A                   | -128.85          | 9.68             | 0.00                              |
|                 | B                   | -128.85          | 99.68            | 0.13                              |
|                 | C                   | -83.85           | 114.68           | 1.37                              |
|                 | D                   | -98.85           | -20.32           | 3.16                              |
|                 | E                   | 111.15           | 144.68           | 3.63                              |
|                 | F                   | -38.85           | 24.68            | 3.63                              |

**Table 2. Inhibitory activities of compounds 9 and 14 against DNA**

| Compound | Structure                                                                         | IC <sub>50</sub> (nM) <sup>a</sup> or RA (%) <sup>b</sup> <i>E. coli</i> gyrase |
|----------|-----------------------------------------------------------------------------------|---------------------------------------------------------------------------------|
| 9        | 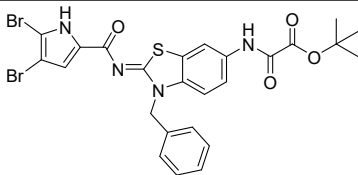 | 2950 ± 470                                                                      |
| 14a      |  | 757 ± 146                                                                       |
| 14b      |  | @10 μM =<br>77 ± 6% <sup>b</sup>                                                |

**gyrase from *E. coli*.**

<sup>a</sup> Concentration of compound that inhibits the enzyme activity by 50%. <sup>b</sup> RA – Residual activity of the enzyme at the indicated concentration of the compound. Mean values with standard deviations are reported. Biological assessments were performed in duplicate.

# <sup>1</sup>H and <sup>13</sup>C NMR spectra of the representative compounds

## 4,5-Dibromo-N-(6-nitrobenzo[d]thiazol-2-yl)-1H-pyrrole-2-carboxamide (6)

<sup>1</sup>H NMR (400 MHz, DMSO-d<sub>6</sub>)

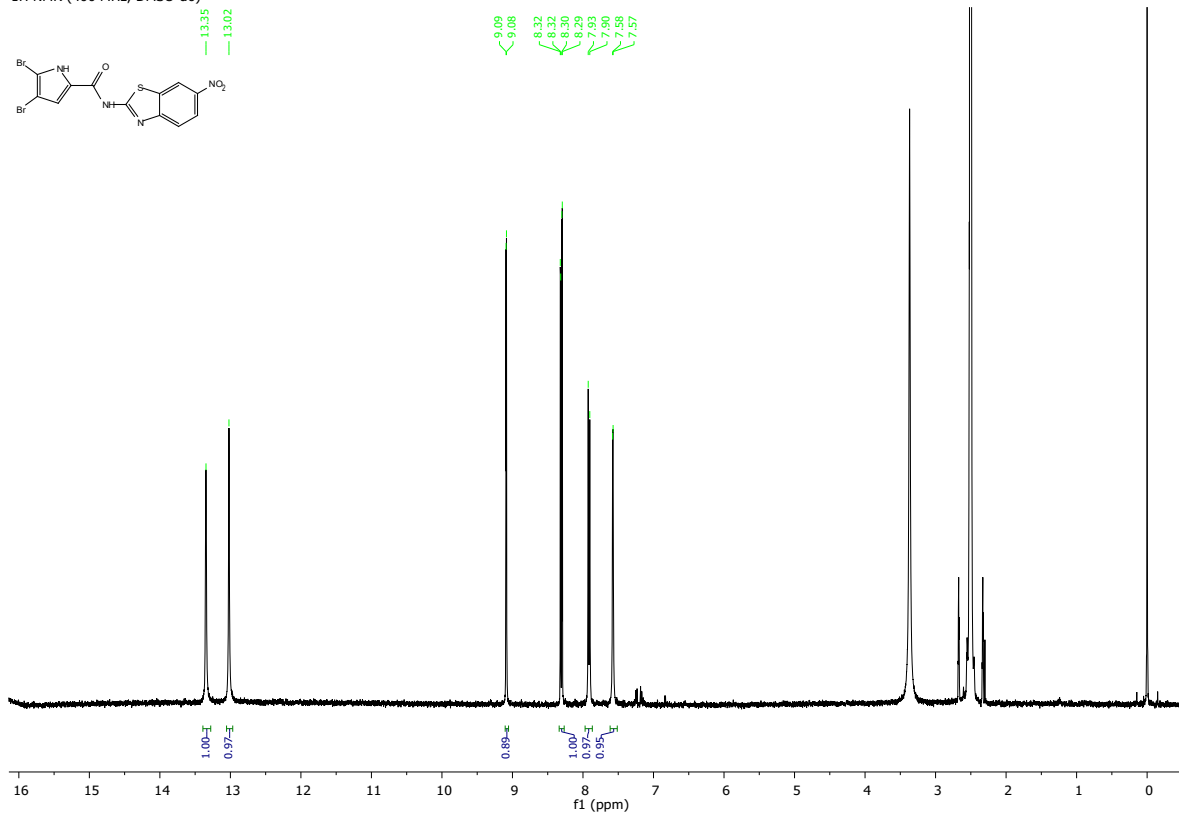

<sup>13</sup>C NMR (100 MHz, DMSO-d<sub>6</sub>)

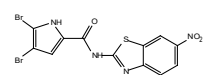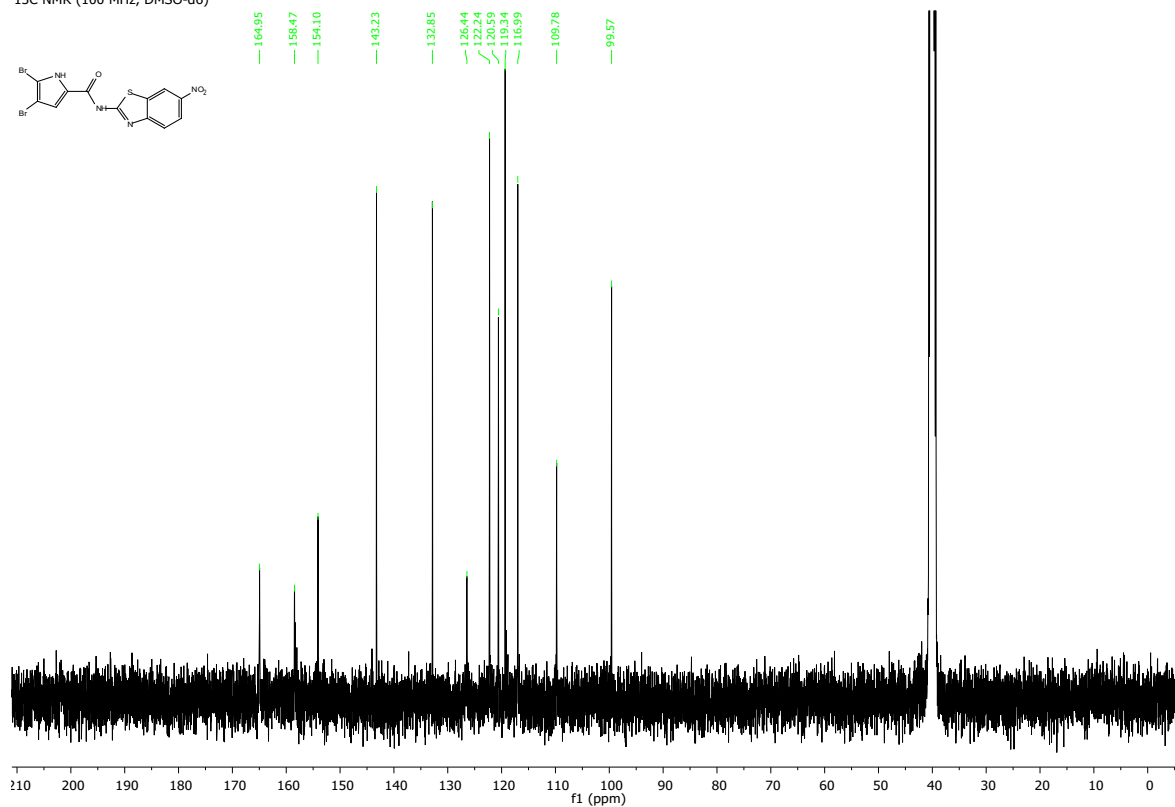

# (Z)-N-(3-Benzyl-6-nitrobenzo[d]thiazol-2(3H)-ylidene)-4,5-dibromo-1H-pyrrole-2-carboxamide (7)

<sup>1</sup>H NMR (400 MHz, DMSO-d<sub>6</sub>)

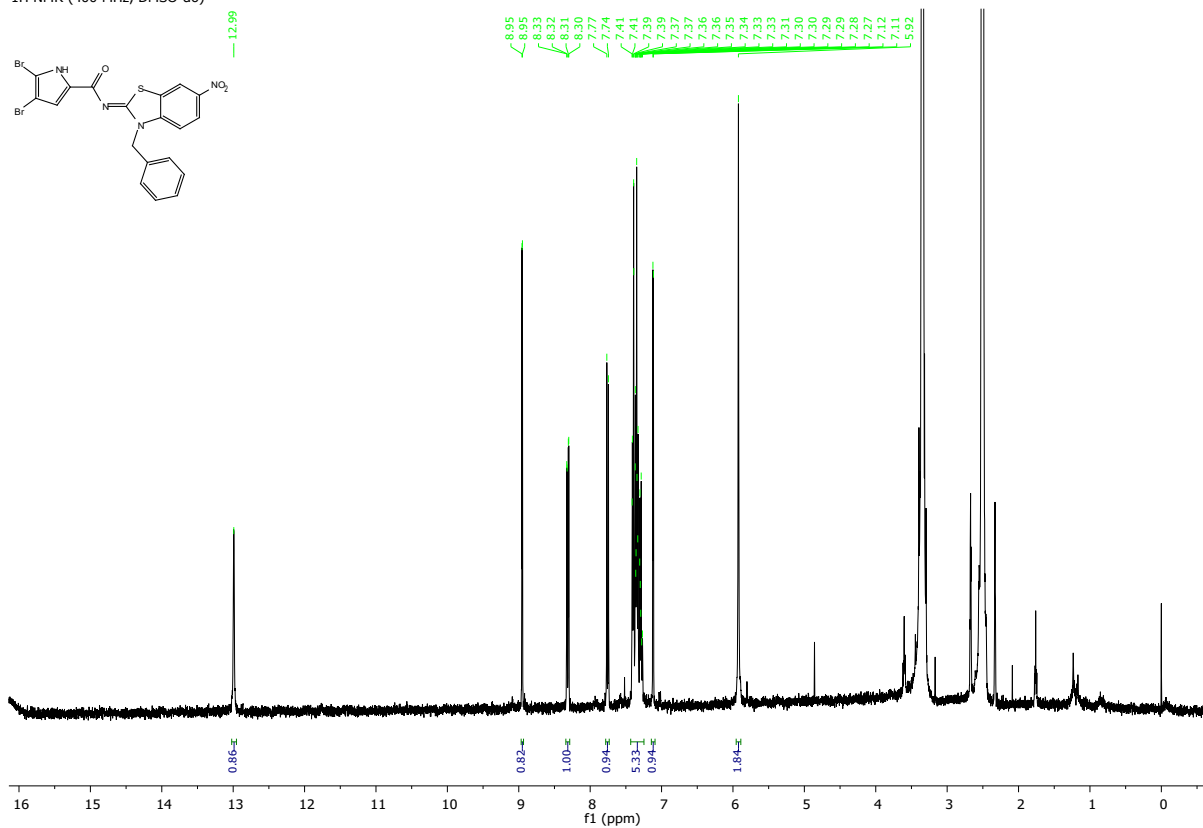

<sup>13</sup>C NMR (100 MHz, DMSO-d<sub>6</sub>)

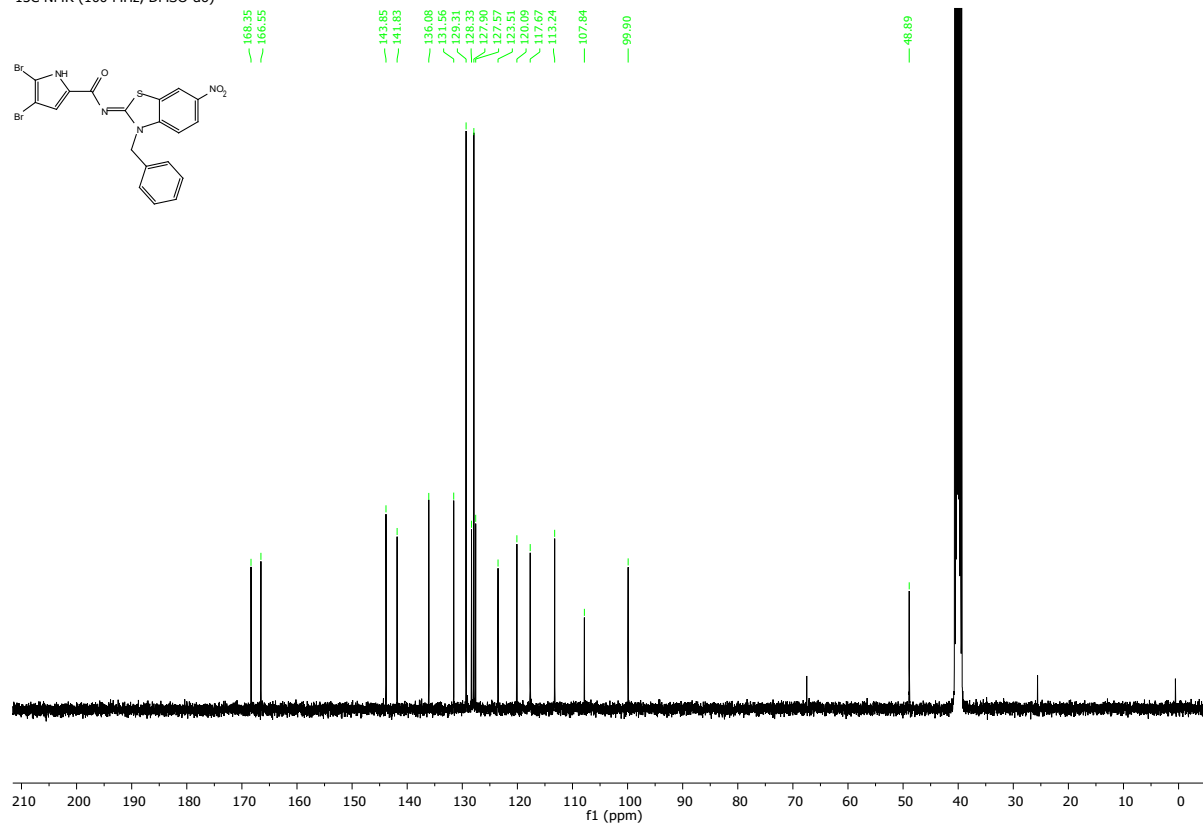

# (Z)-N-(6-Amino-3-benzylbenzo[d]thiazol-2(3H)-ylidene)-4,5-dibromo-1H-pyrrole-2-carboxamide (**8**)

<sup>1</sup>H NMR (400 MHz, DMSO-d<sub>6</sub>)

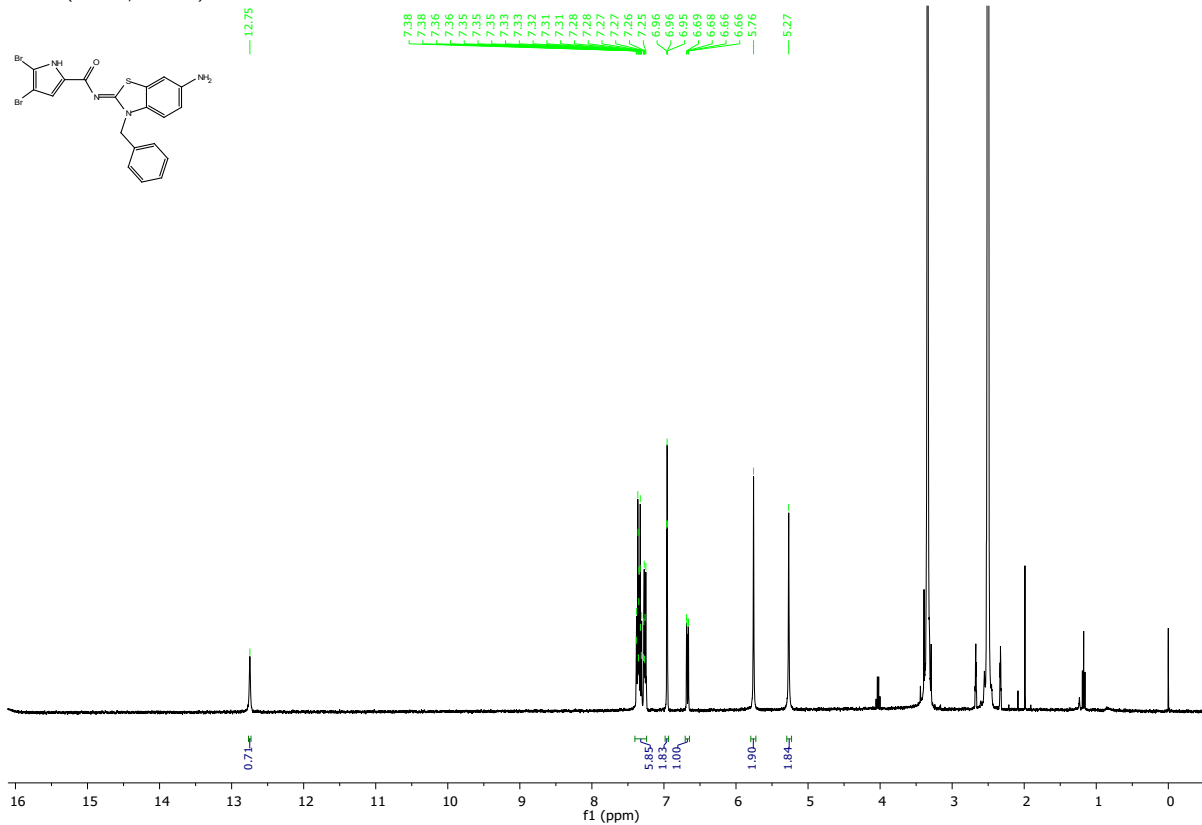

<sup>13</sup>C NMR (100 MHz, DMSO-d<sub>6</sub>)

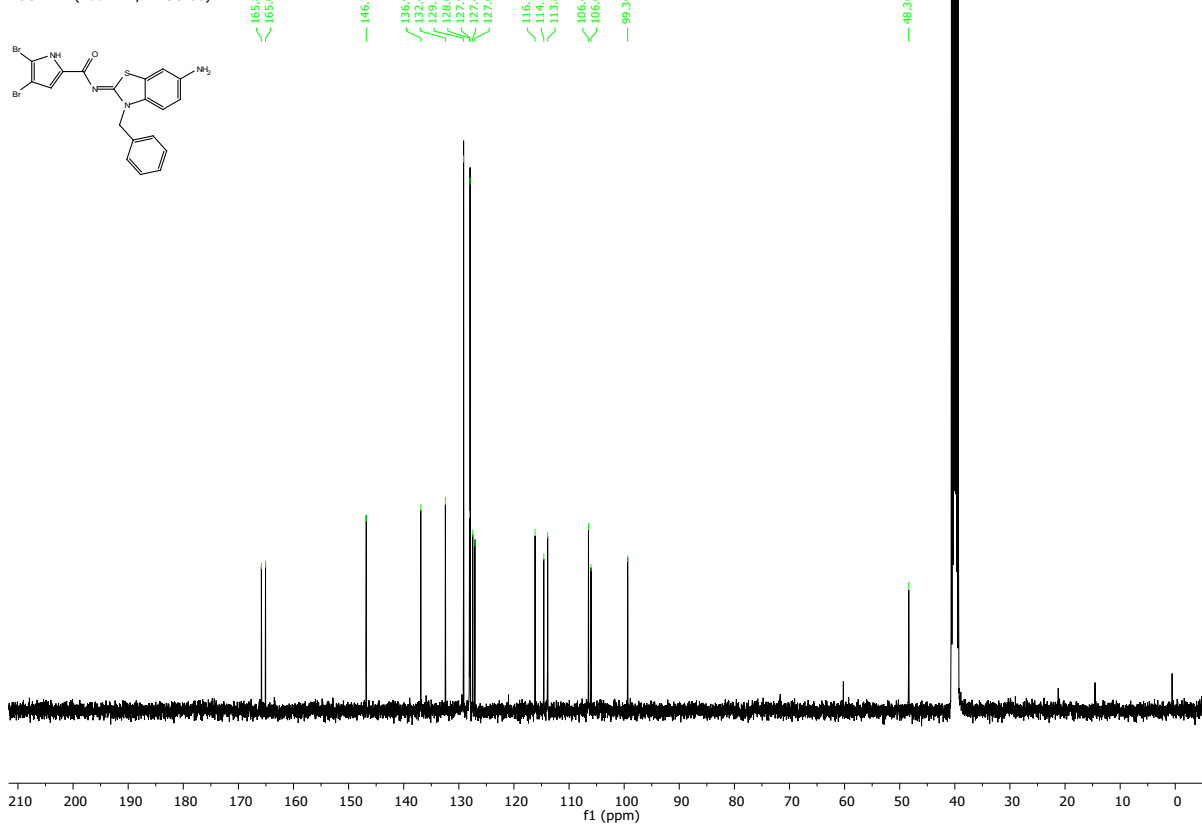

**tert-Butyl(Z)-2-((3-benzyl-2-((4,5-dibromo-1H-pyrrole-2-carbonyl)imino)-2,3-dihydrobenzo[d]thiazol-6-yl)amino)-2-oxoacetate (9)**

<sup>1</sup>H NMR (400 MHz, DMSO-d<sub>6</sub>)

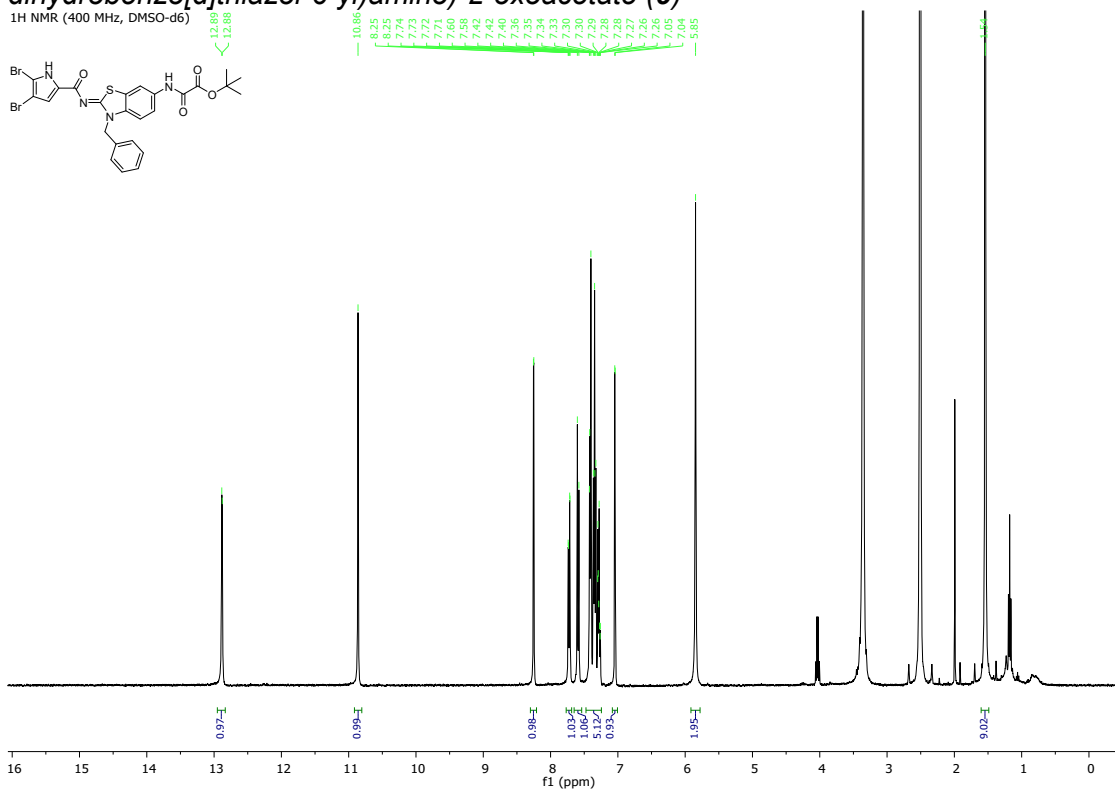

<sup>13</sup>C NMR (100 MHz, DMSO-d<sub>6</sub>)

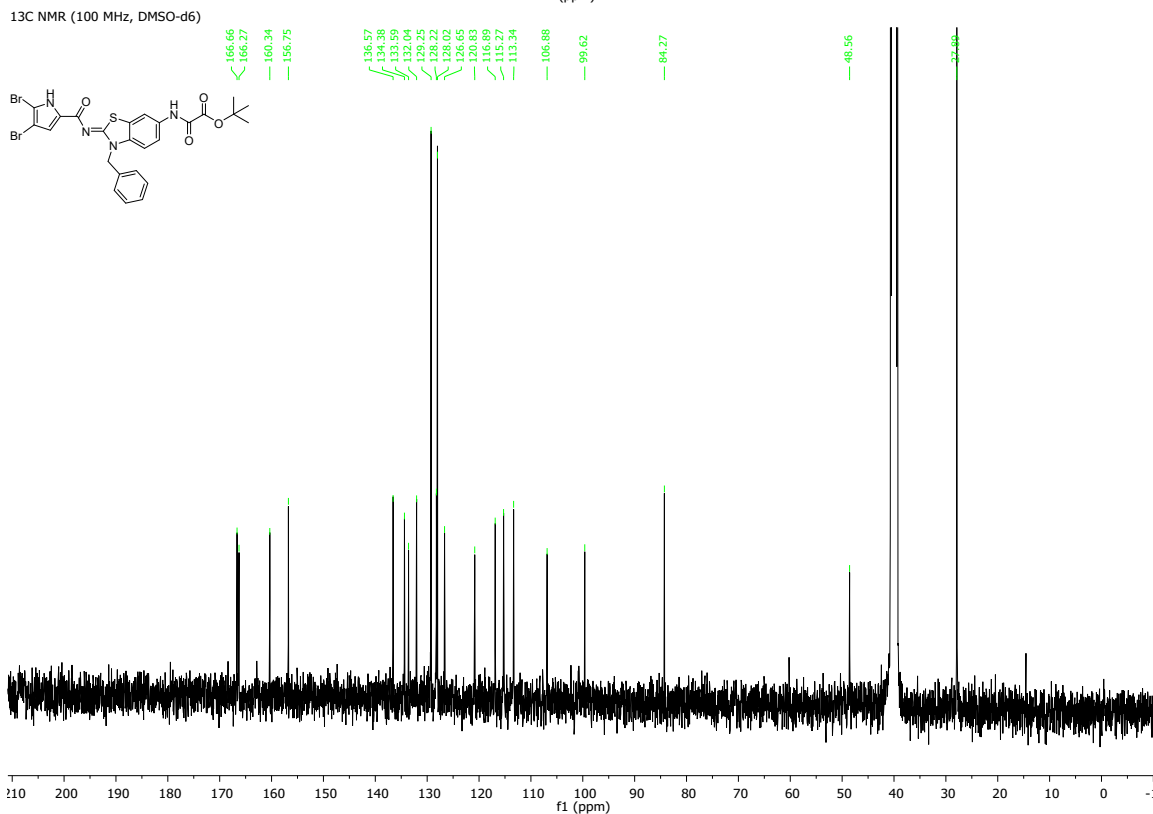



**(Z)-2-((3-Benzyl-2-((4,5-dibromo-1H-pyrrole-2-carbonyl)imino)-2,3-dihydrobenzo[d]thiazol-6-yl)amino)-2-oxoacetic acid (2)**

<sup>1</sup>H NMR (400 MHz, DMSO-d<sub>6</sub>)

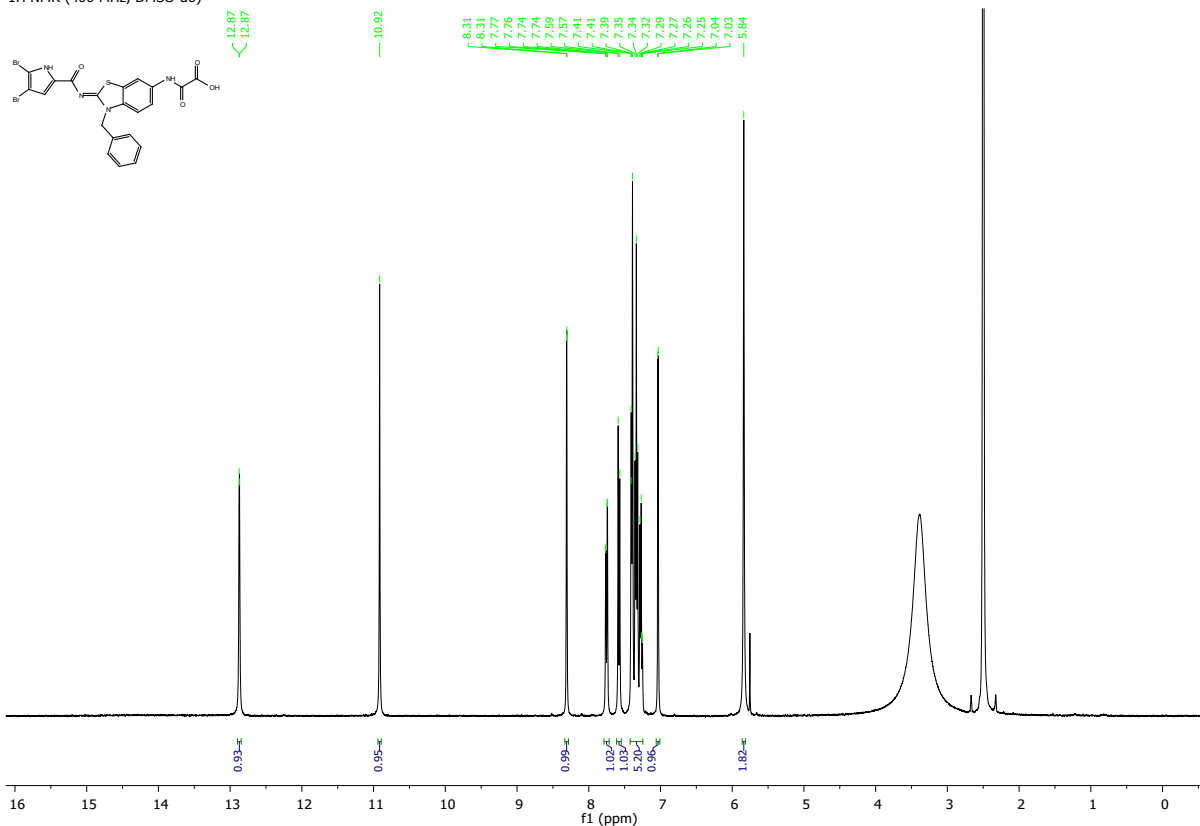

<sup>13</sup>C NMR (100 MHz, DMSO-d<sub>6</sub>)

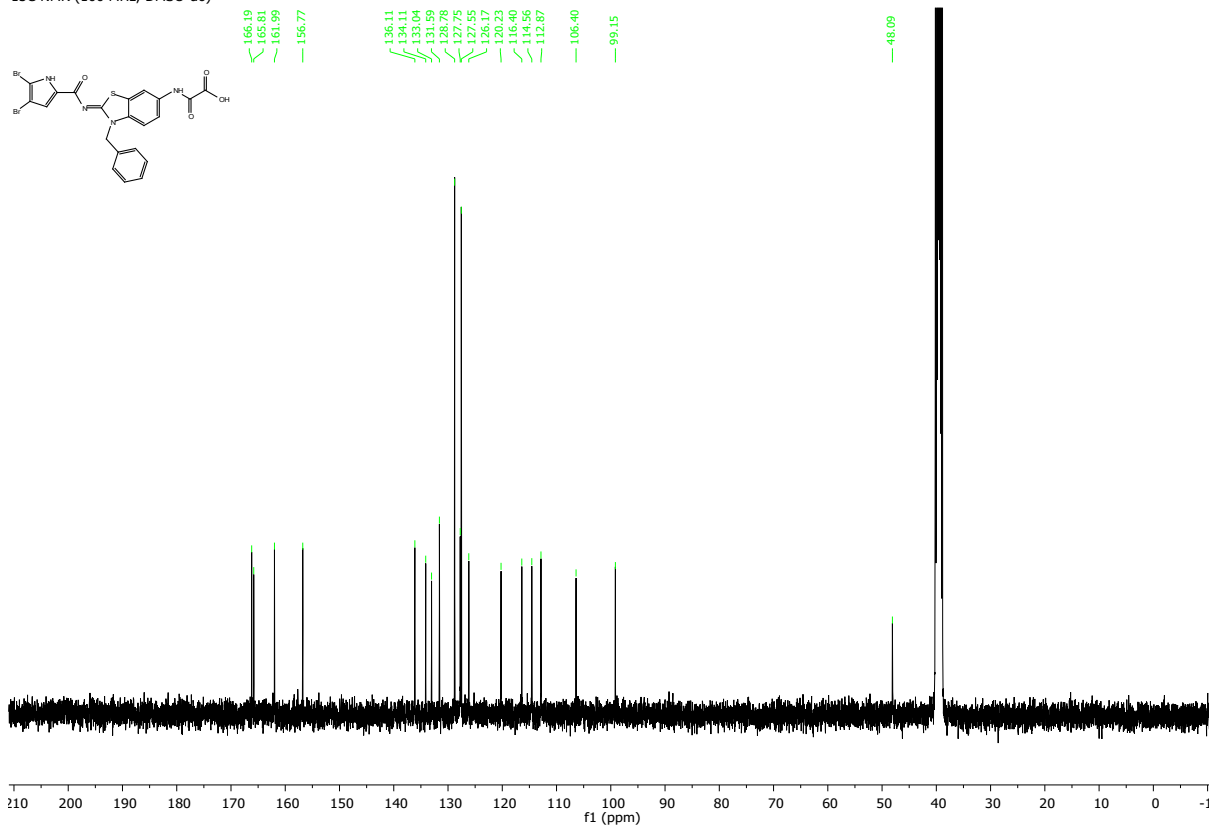



### 2-Bromo-6-nitrobenzo[d]thiazole (10)

<sup>1</sup>H NMR (400 MHz, chloroform-d)

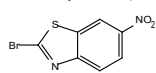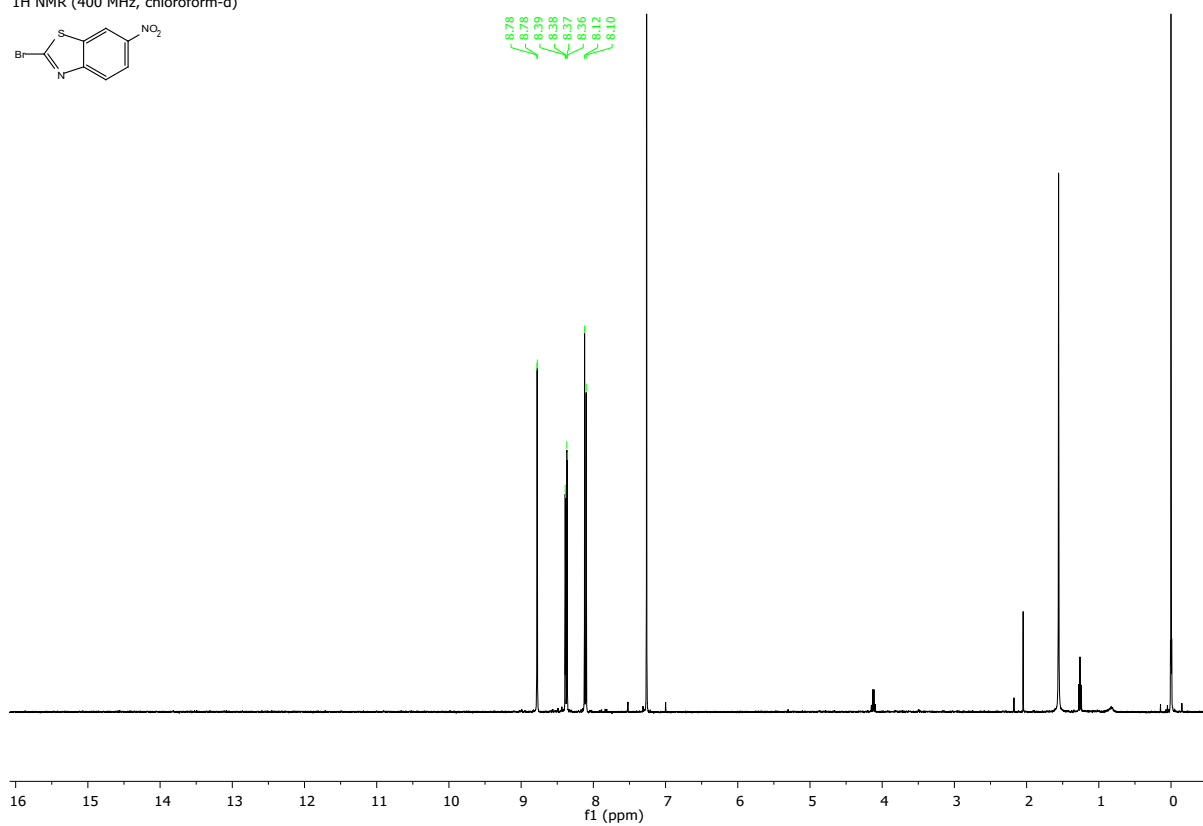

### N-Benzyl-6-nitrobenzo[d]thiazol-2-amine (11a)

<sup>1</sup>H NMR (400 MHz, chloroform-d)

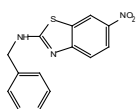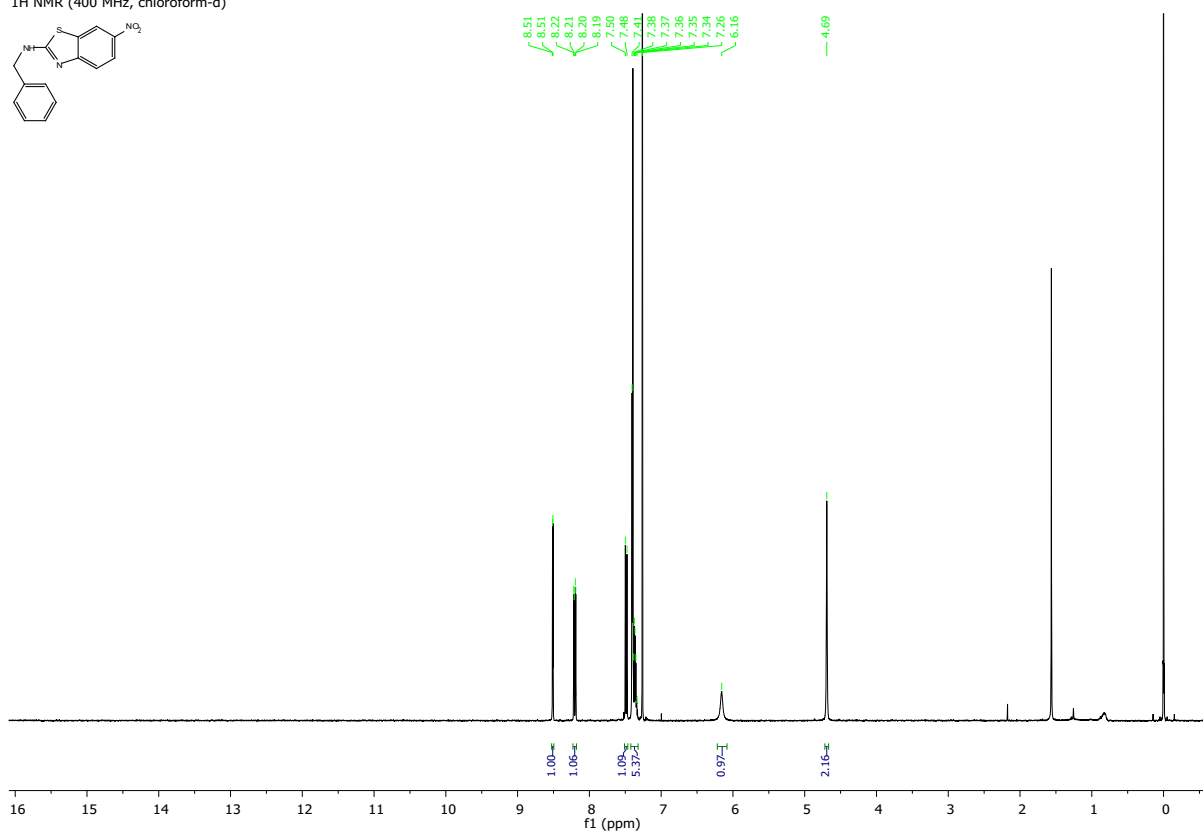



# *N*-Benzyl-4,5-dibromo-*N*-(6-nitrobenzo[*d*]thiazol-2-yl)-1*H*-pyrrole-2-carboxamide (**12a**)

<sup>1</sup>H NMR (400 MHz, DMSO-*d*<sub>6</sub>)

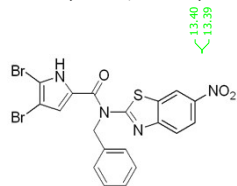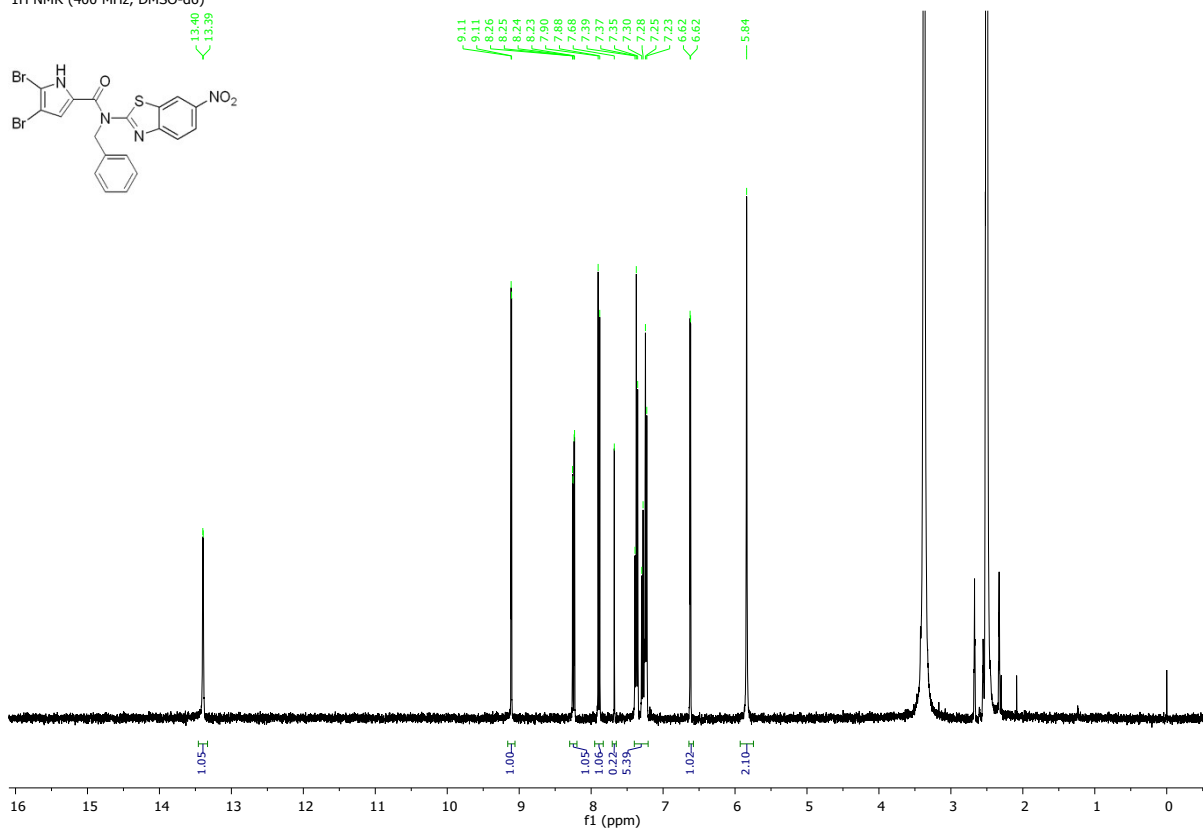

<sup>13</sup>C NMR (400 MHz, DMSO-*d*<sub>6</sub>)

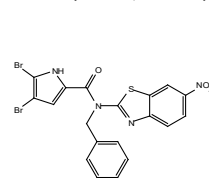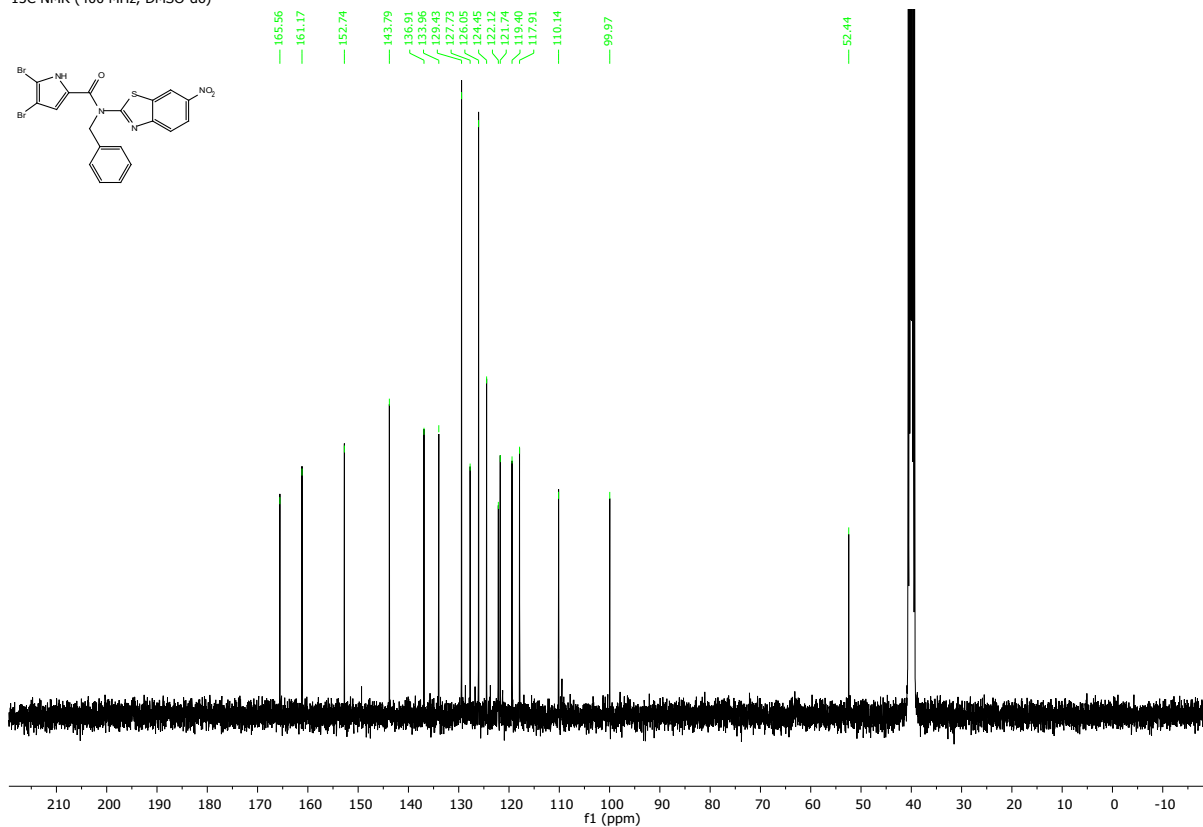



# *N*-(6-Aminobenzo[d]thiazol-2-yl)-*N*-benzyl-4,5-dibromo-1*H*-pyrrole-2-carboxamide (**13a**)

<sup>1</sup>H NMR (400 MHz, DMSO-d<sub>6</sub>)

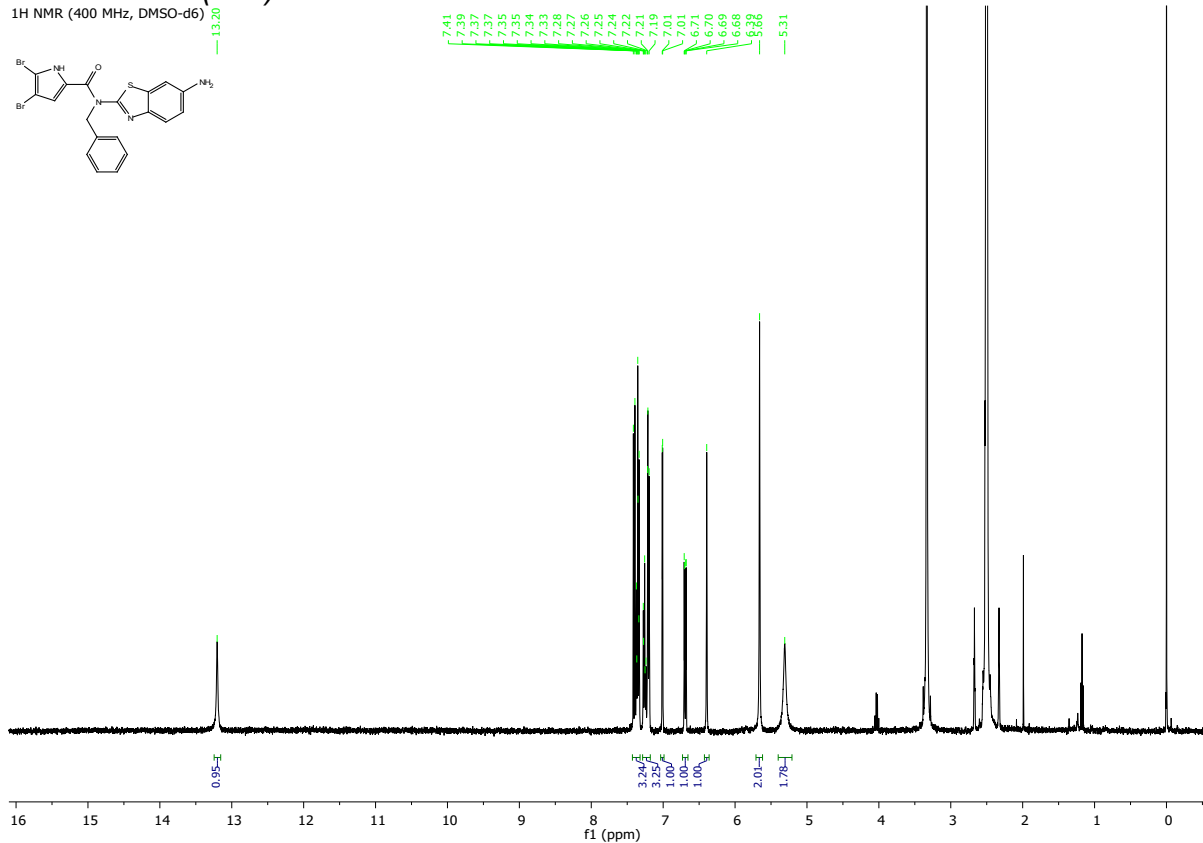

<sup>13</sup>C NMR (100 MHz, DMSO-d<sub>6</sub>)

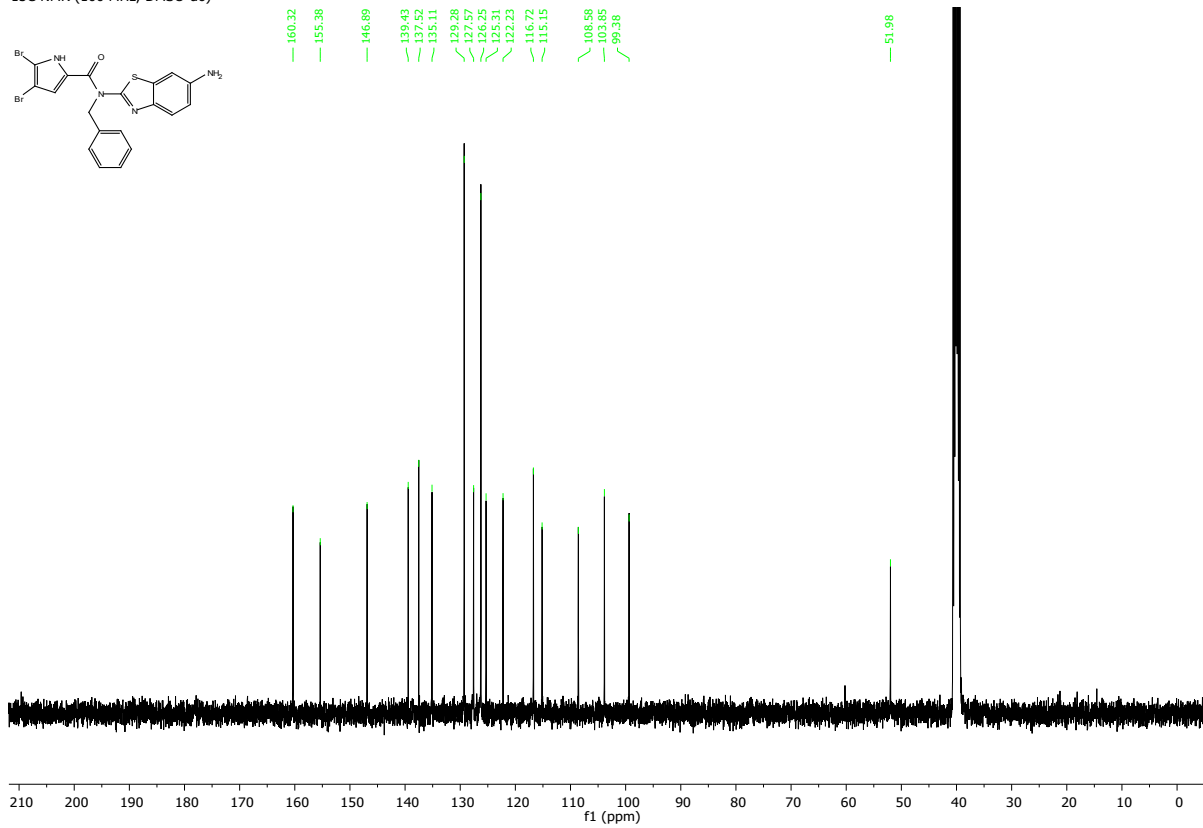

**tert-Butyl-2-((2-(N-benzyl-4,5-dibromo-1H-pyrrole-2-carboxamido)benzo[d]thiazol-6-yl)amino)-2-oxoacetate (14a)**

<sup>1</sup>H NMR (400 MHz, DMSO-d<sub>6</sub>)

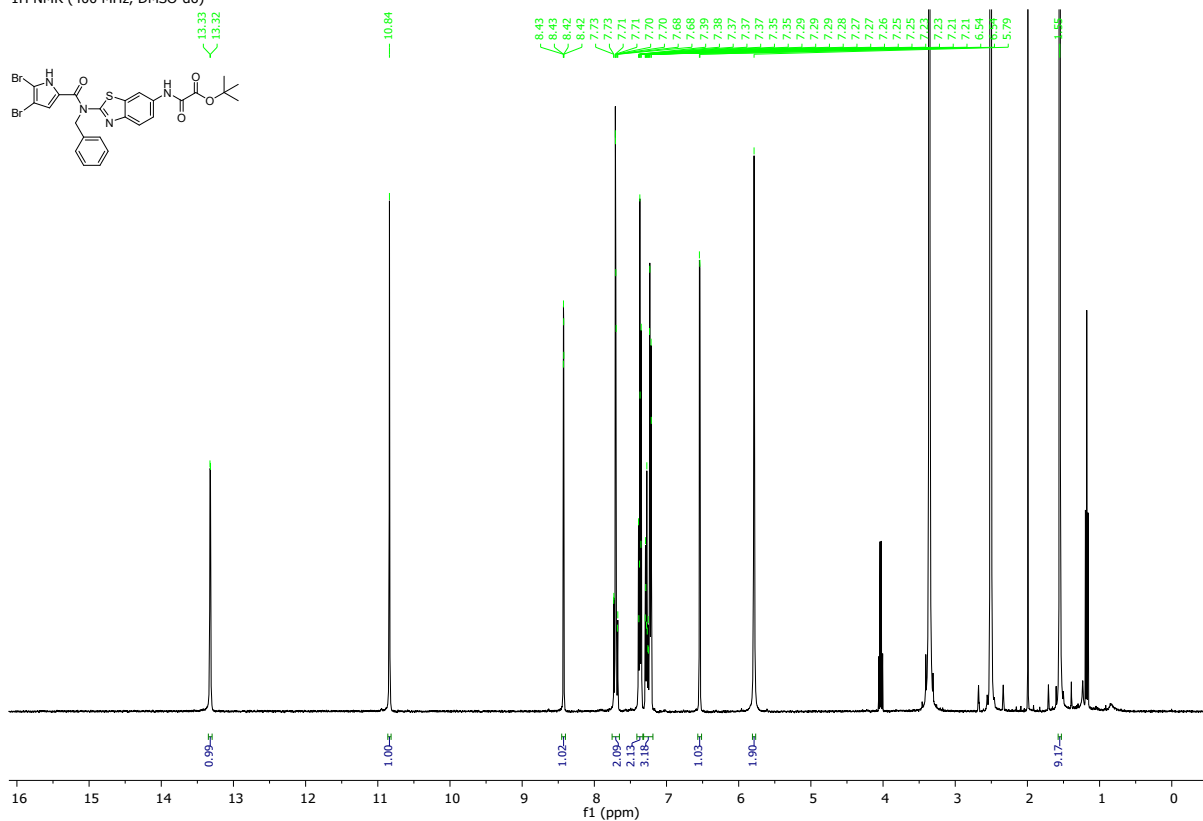

<sup>13</sup>C NMR (100 MHz, DMSO-d<sub>6</sub>)

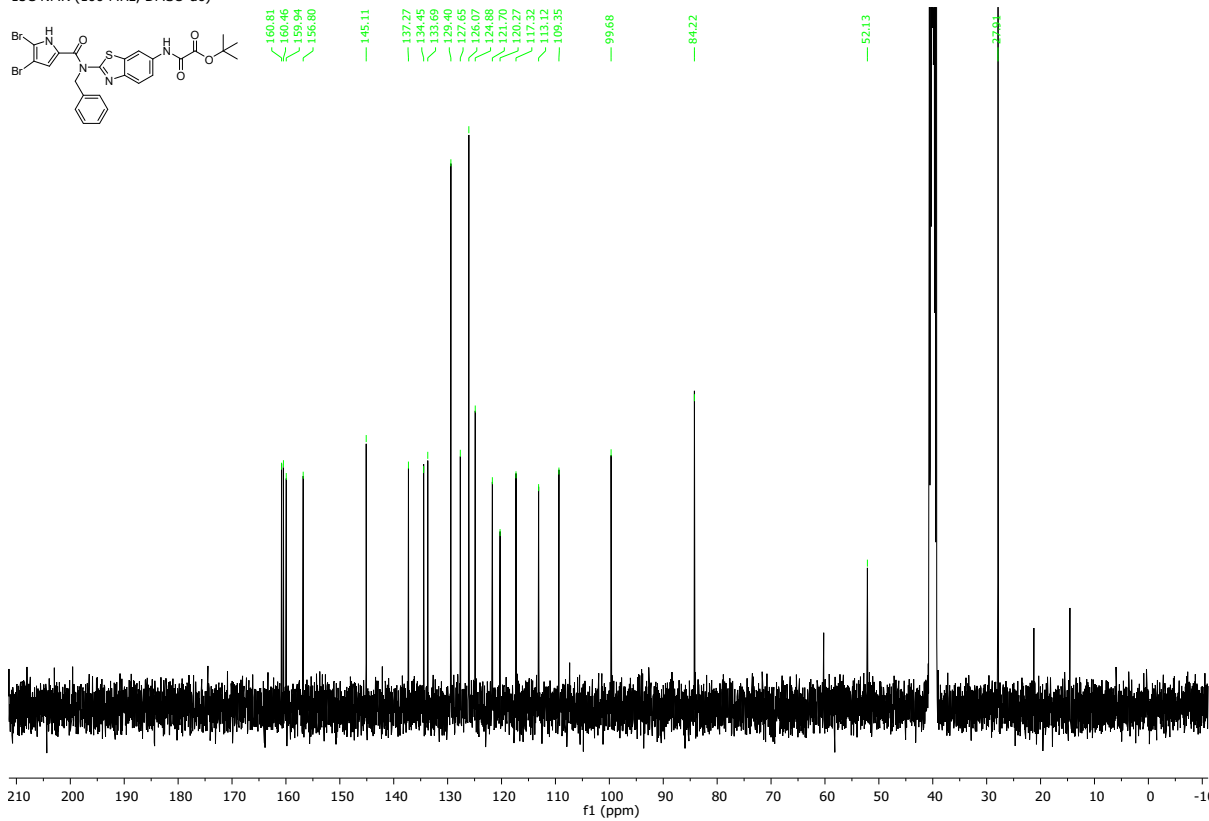



# 2-((2-(N-Benzyl-4,5-dibromo-1H-pyrrole-2-carboxamido)benzo[d]thiazol-6-yl)amino)-2-oxoacetic acid (3)

<sup>1</sup>H NMR (400 MHz, DMSO-d<sub>6</sub>)

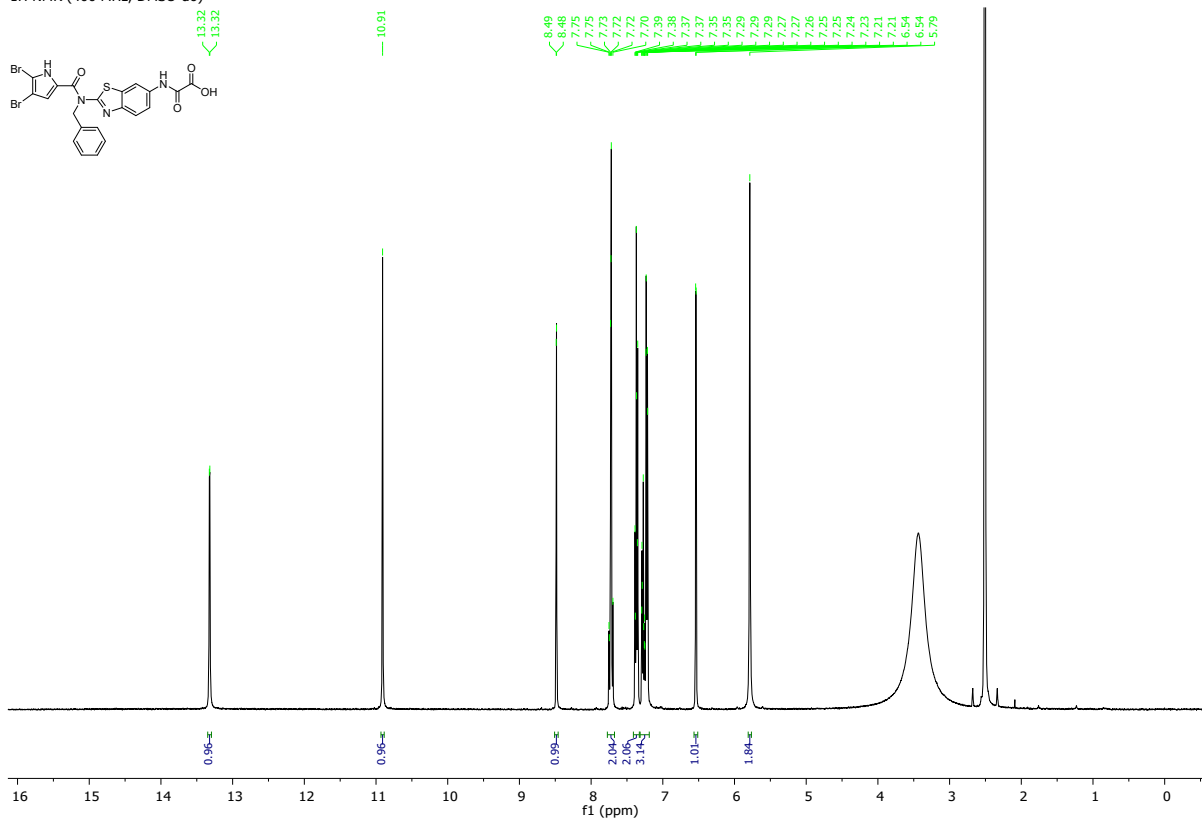

<sup>13</sup>C NMR (100 MHz, DMSO-d<sub>6</sub>)

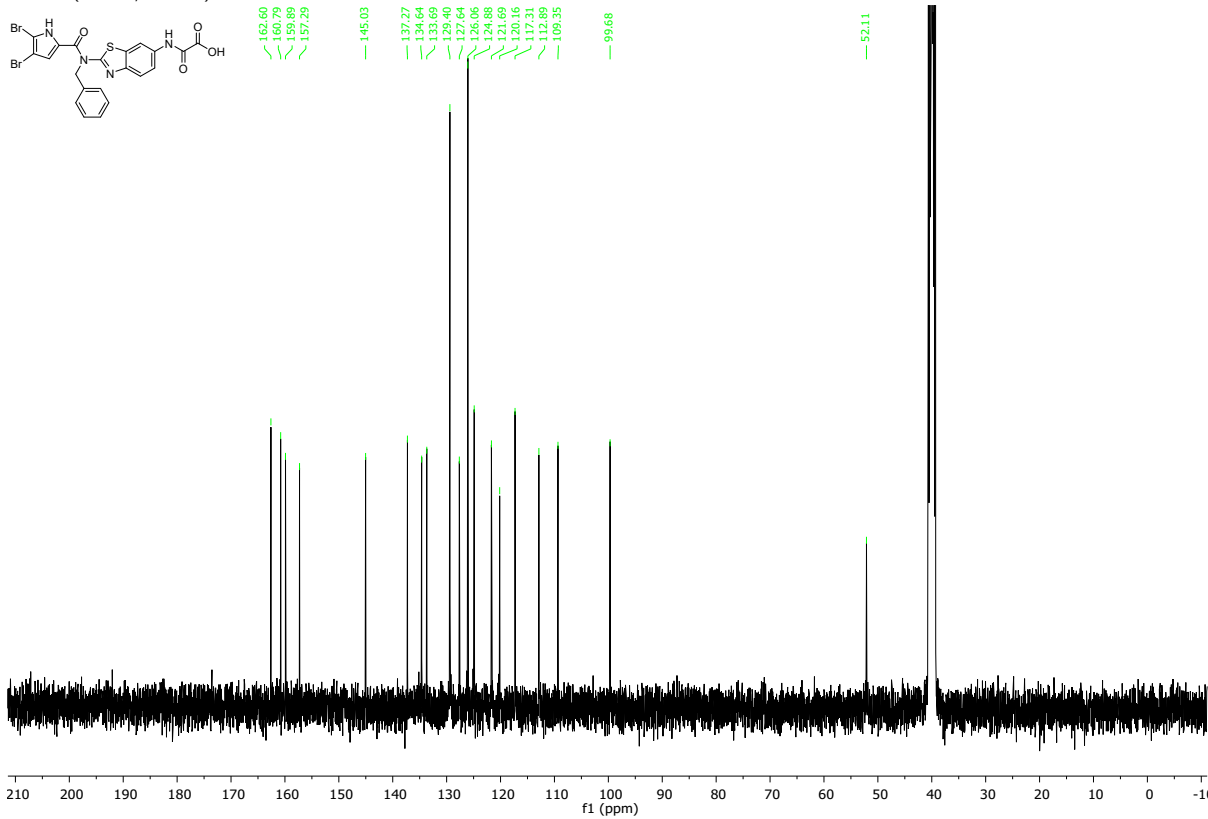

# tert-Butyl 3-(((6-nitrobenzo[d]thiazol-2-yl)amino)methyl)benzoate (11b)

<sup>1</sup>H NMR (400 MHz, DMSO-d<sub>6</sub>)

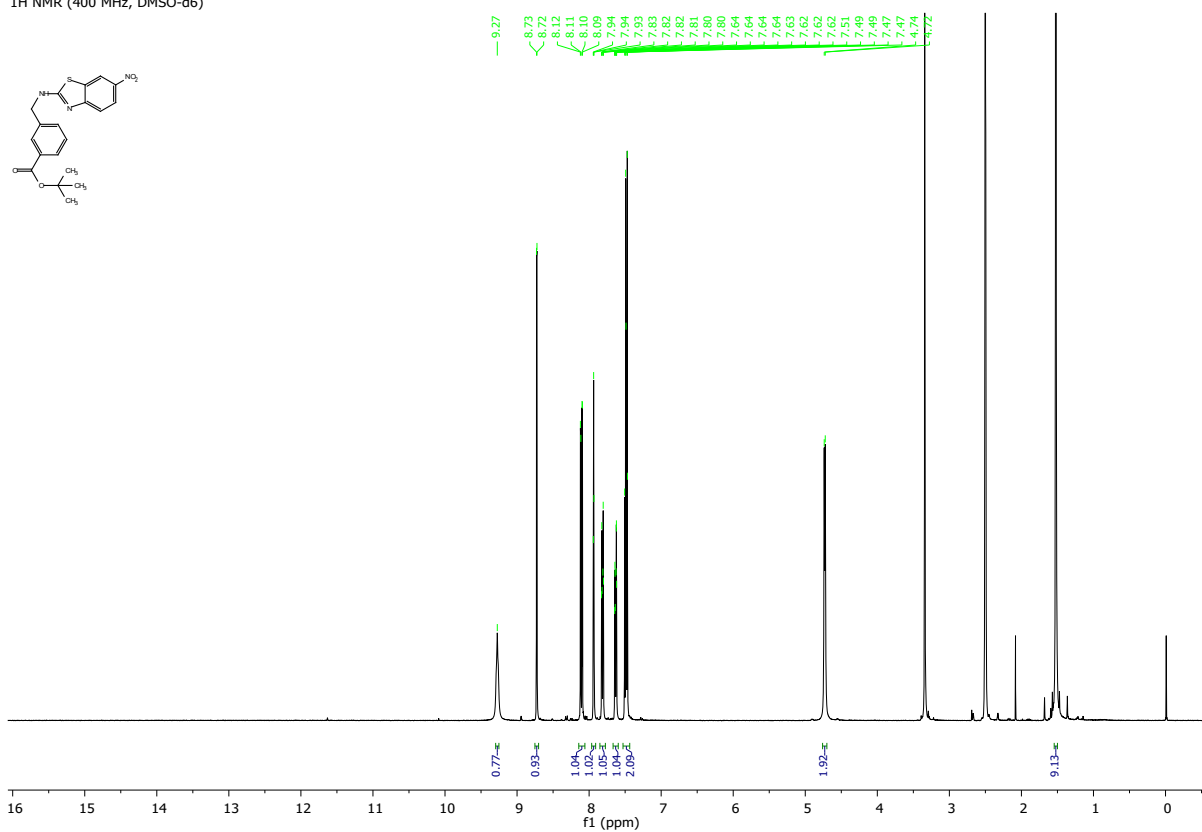

<sup>13</sup>C NMR (100 MHz, DMSO-d<sub>6</sub>)

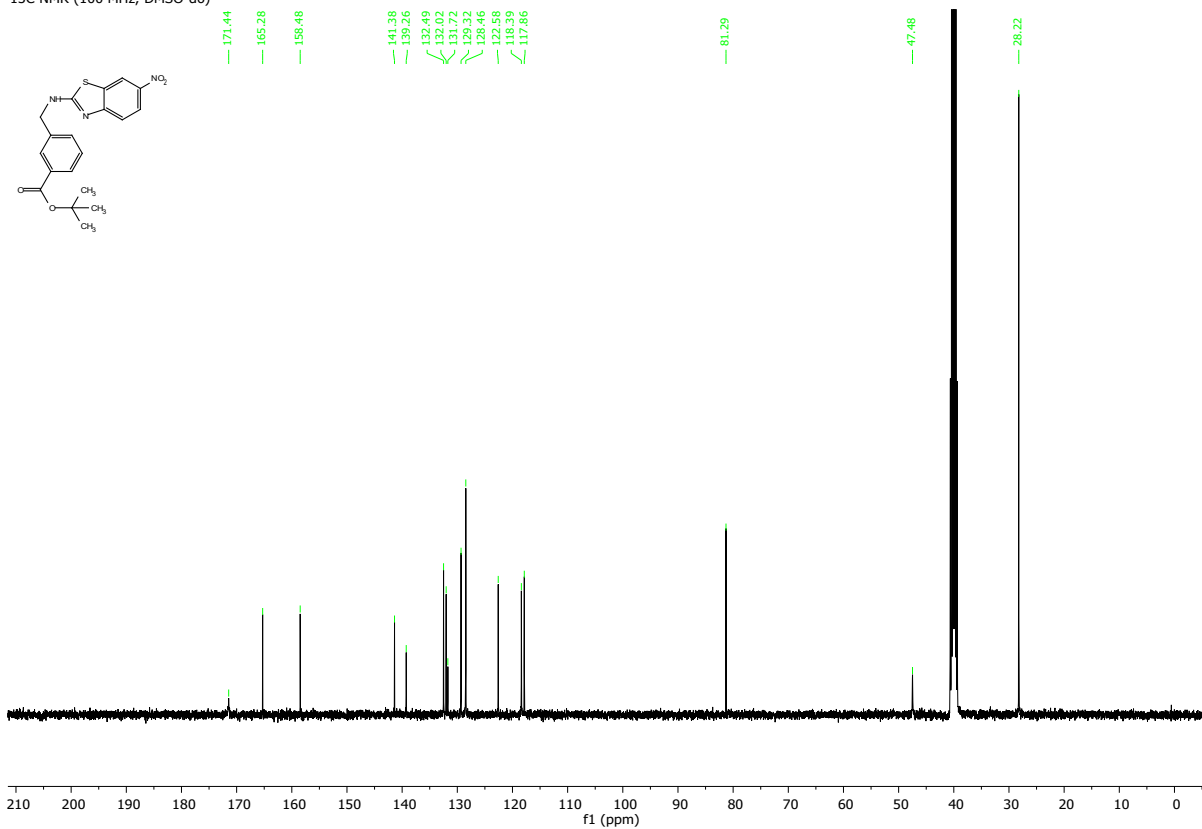

**tert-Butyl 3-((4,5-dibromo-N-(6-nitrobenzo[d]thiazol-2-yl)-1H-pyrrole-2-carboxamido)methyl)benzoate (12b)**

<sup>1</sup>H NMR (400 MHz, DMSO-d<sub>6</sub>)

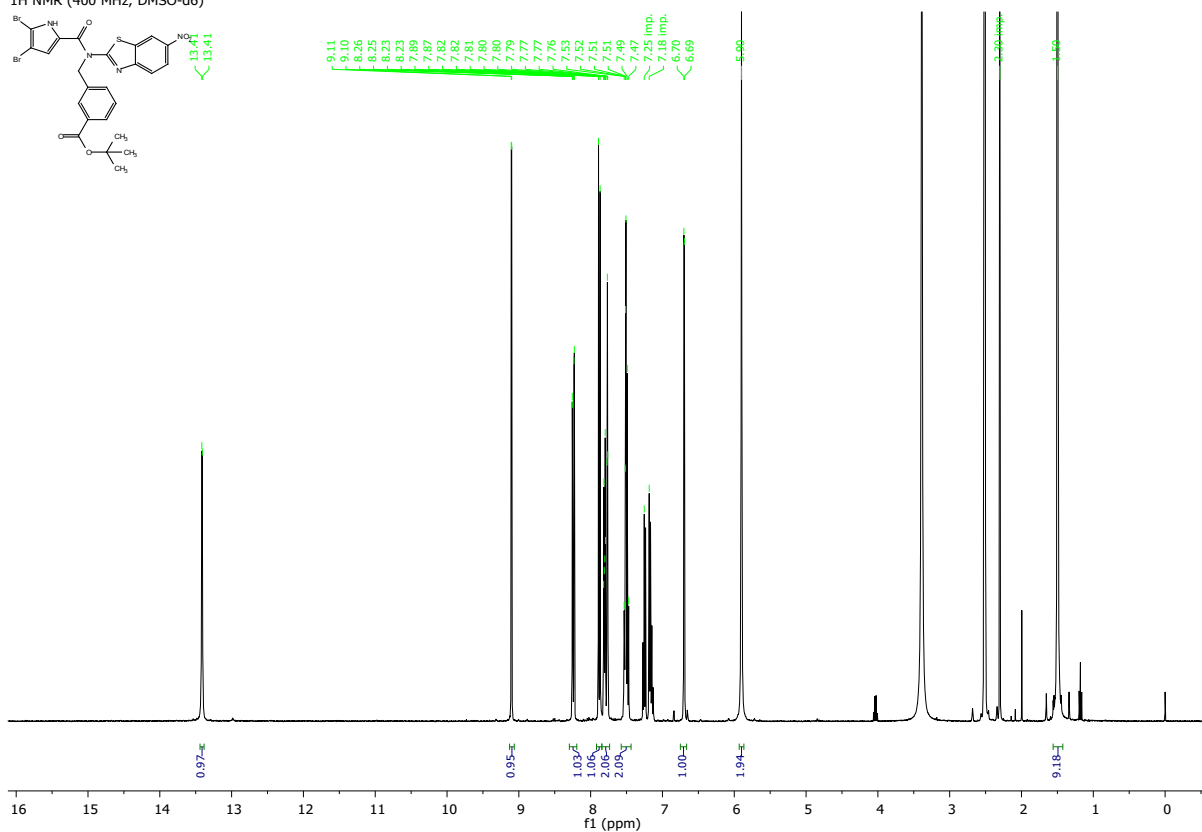

<sup>13</sup>C NMR (100 MHz, DMSO-d<sub>6</sub>)

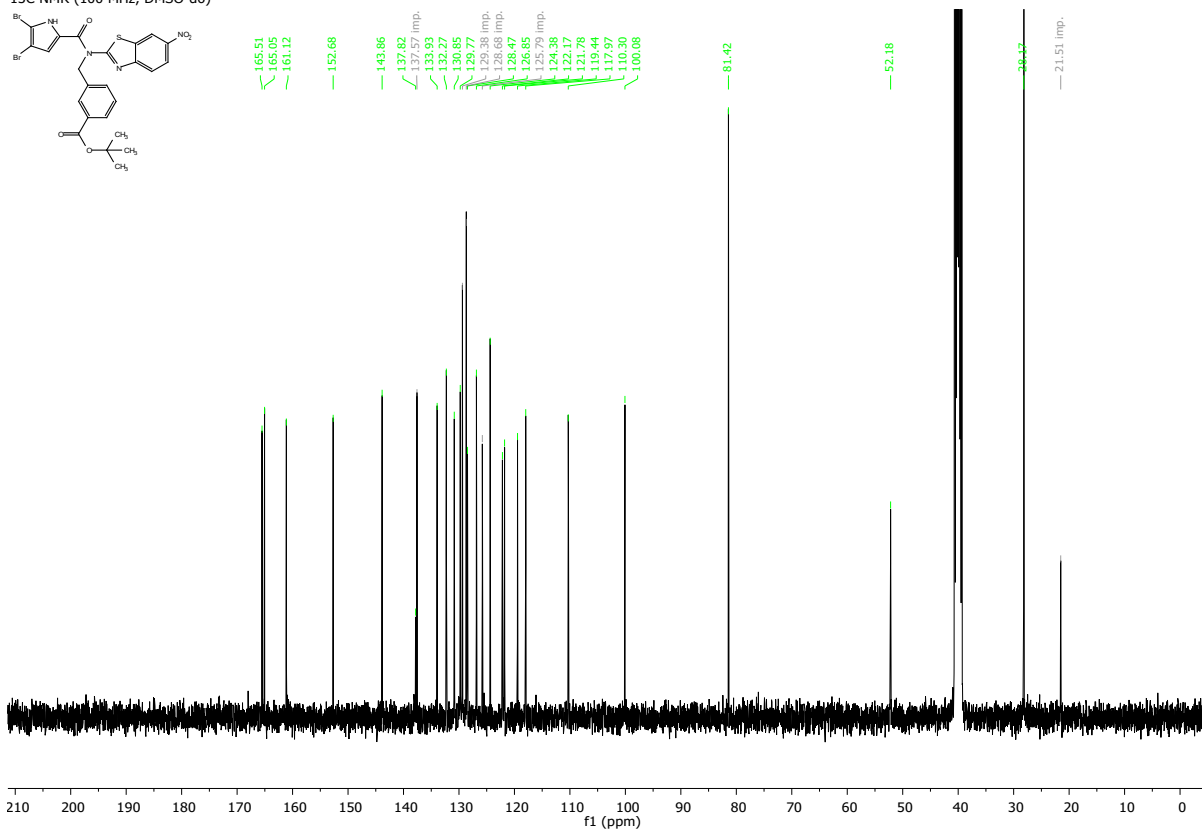

# tert-Butyl 3-((N-(6-aminobenzo[d]thiazol-2-yl)-4,5-dibromo-1H-pyrrole-2-carboxamido)methyl)benzoate (**13b**)

<sup>1</sup>H NMR (400 MHz, DMSO-d<sub>6</sub>)

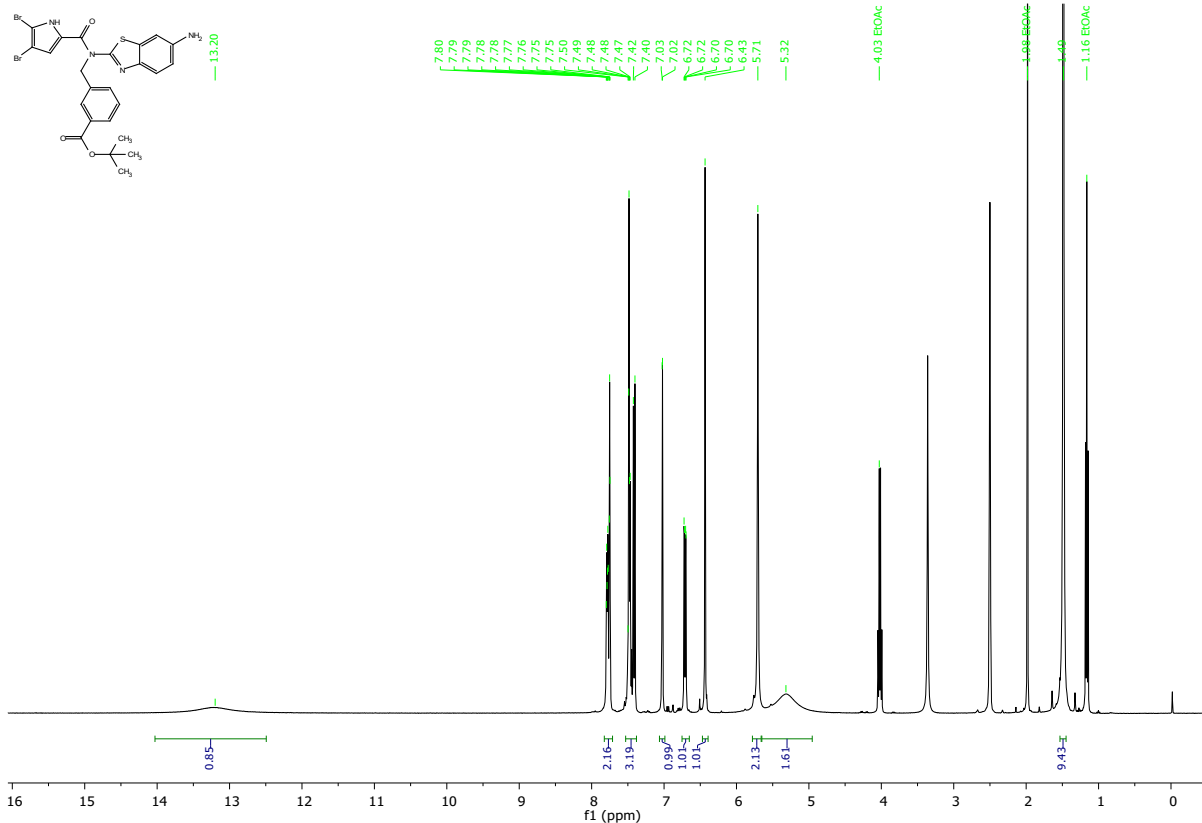

<sup>13</sup>C NMR (100 MHz, DMSO-d<sub>6</sub>)

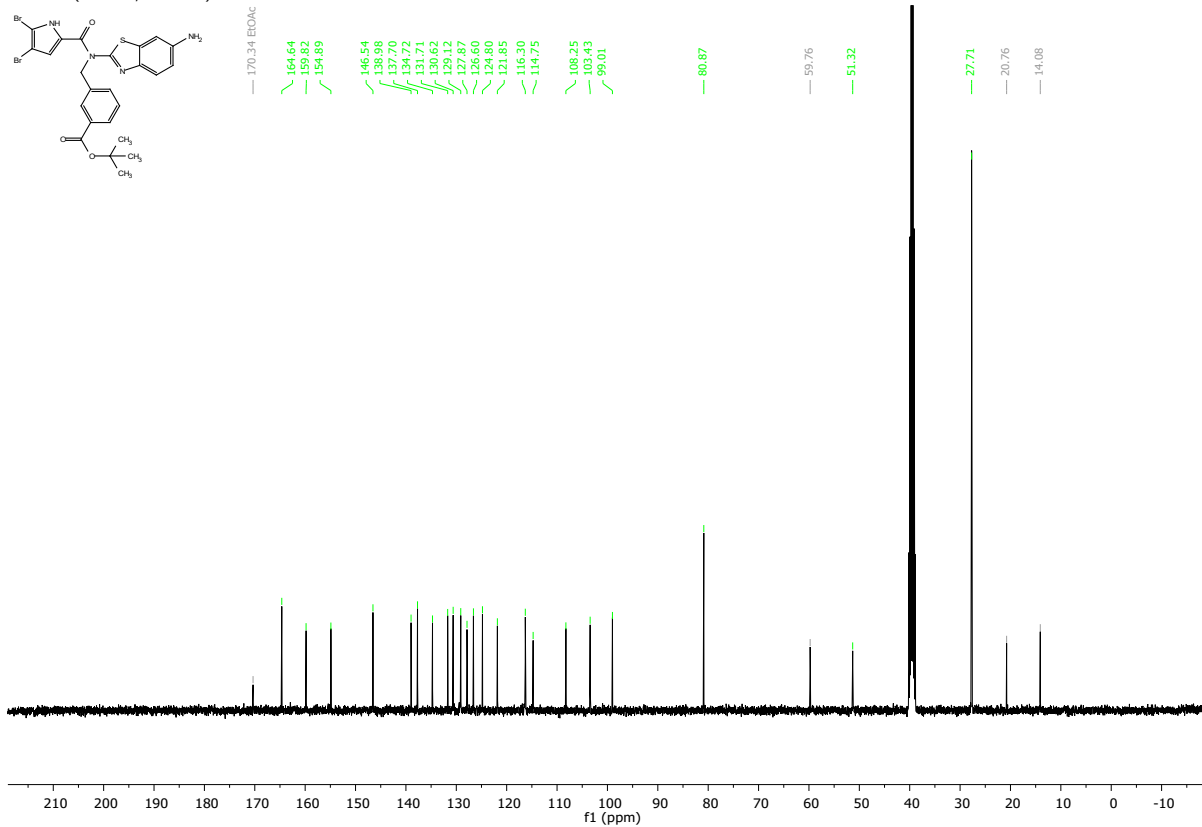

**tert-Butyl 3-((4,5-dibromo-N-(6-(2-(tert-butoxy)-2-oxoacetamido)benzo[d]thiazol-2-yl)-1H-pyrrole-2-carboxamido)methyl)benzoate (14b)**

<sup>1</sup>H NMR (400 MHz, DMSO-d<sub>6</sub>)

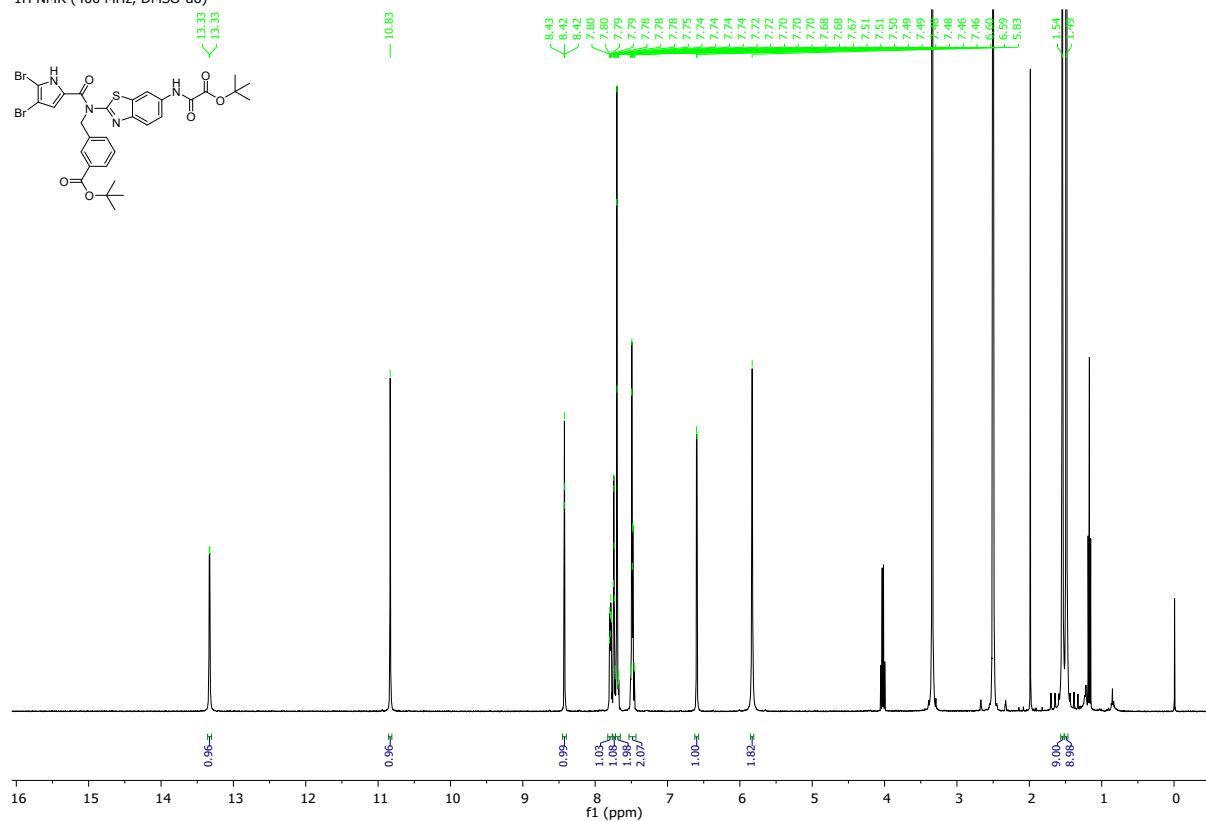

<sup>13</sup>C NMR (100 MHz, DMSO-d<sub>6</sub>)

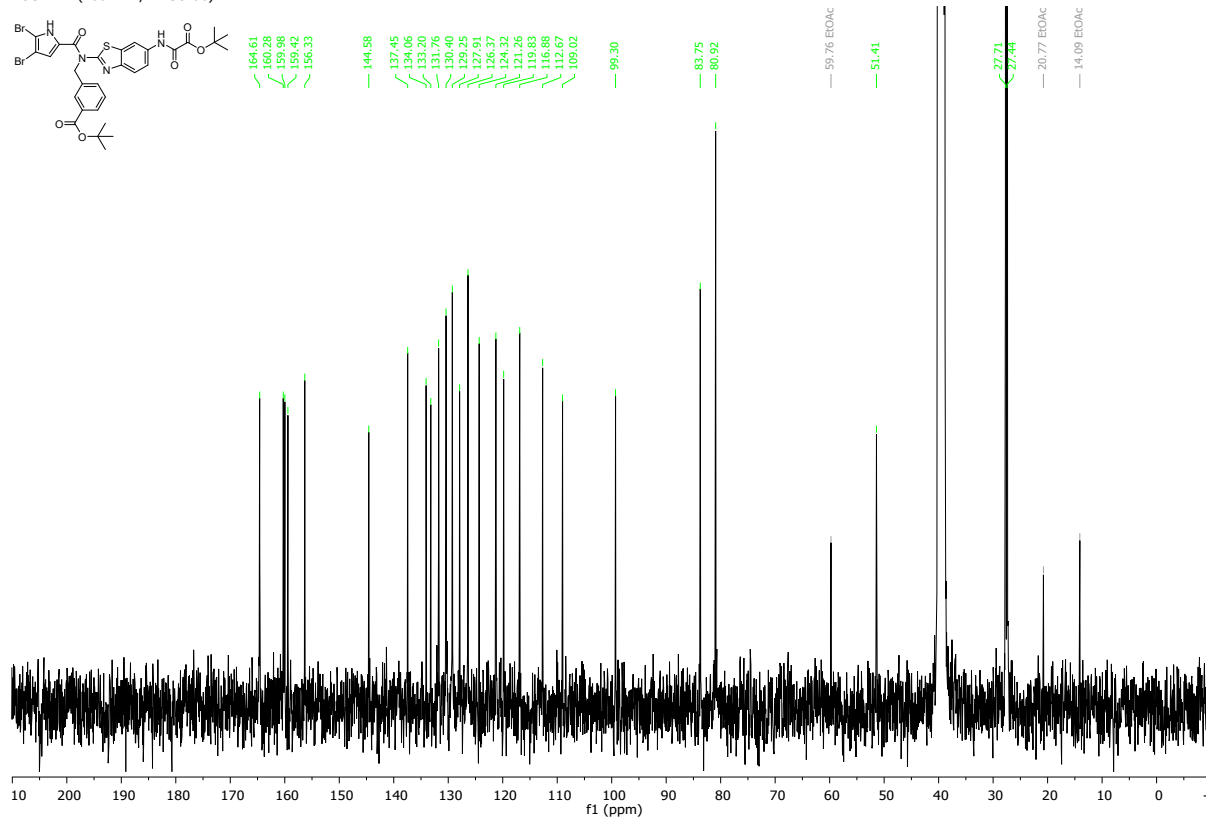

### 3-((4,5-Dibromo-N-(6-(carboxyformamido)benzo[d]thiazol-2-yl)-1H-pyrrole-2-carboxamido)methyl)benzoic acid (**4**)

<sup>1</sup>H NMR (400 MHz, DMSO-d<sub>6</sub>)

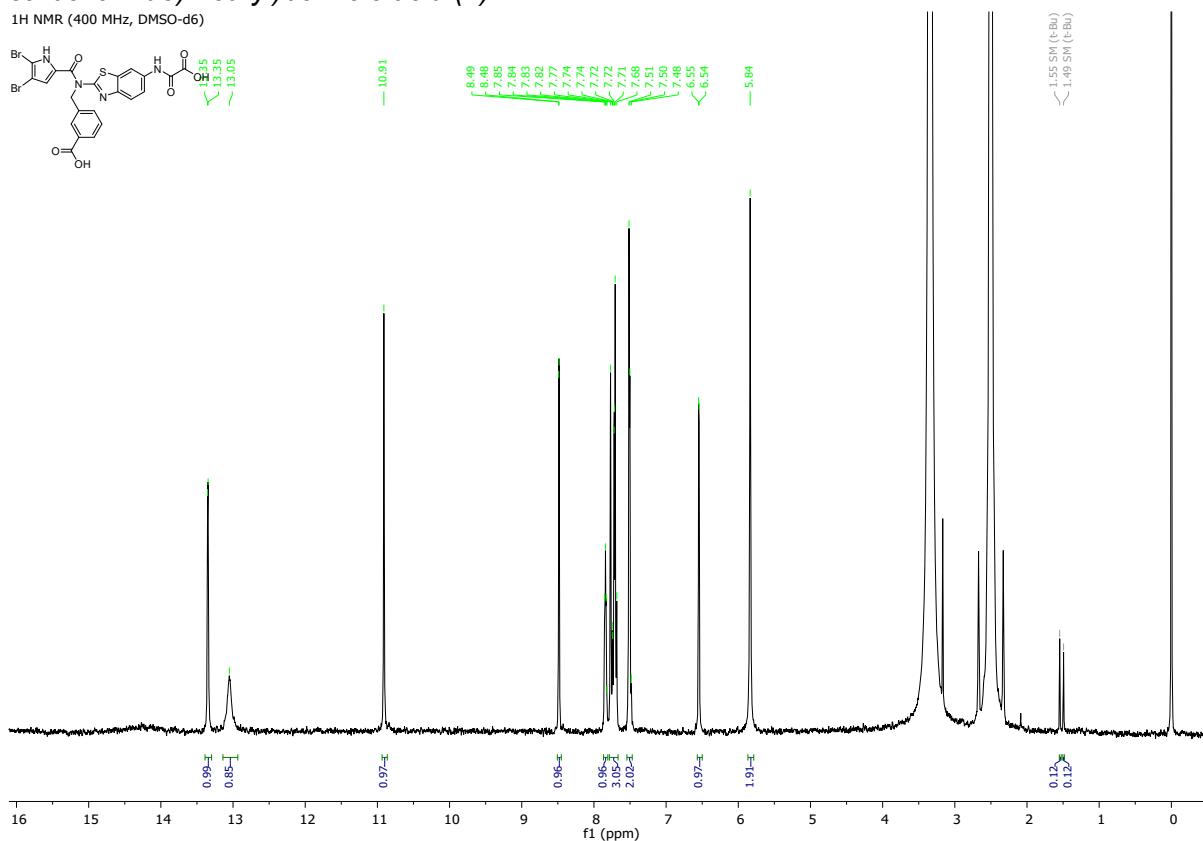

<sup>13</sup>C NMR (100 MHz, DMSO-d<sub>6</sub>)

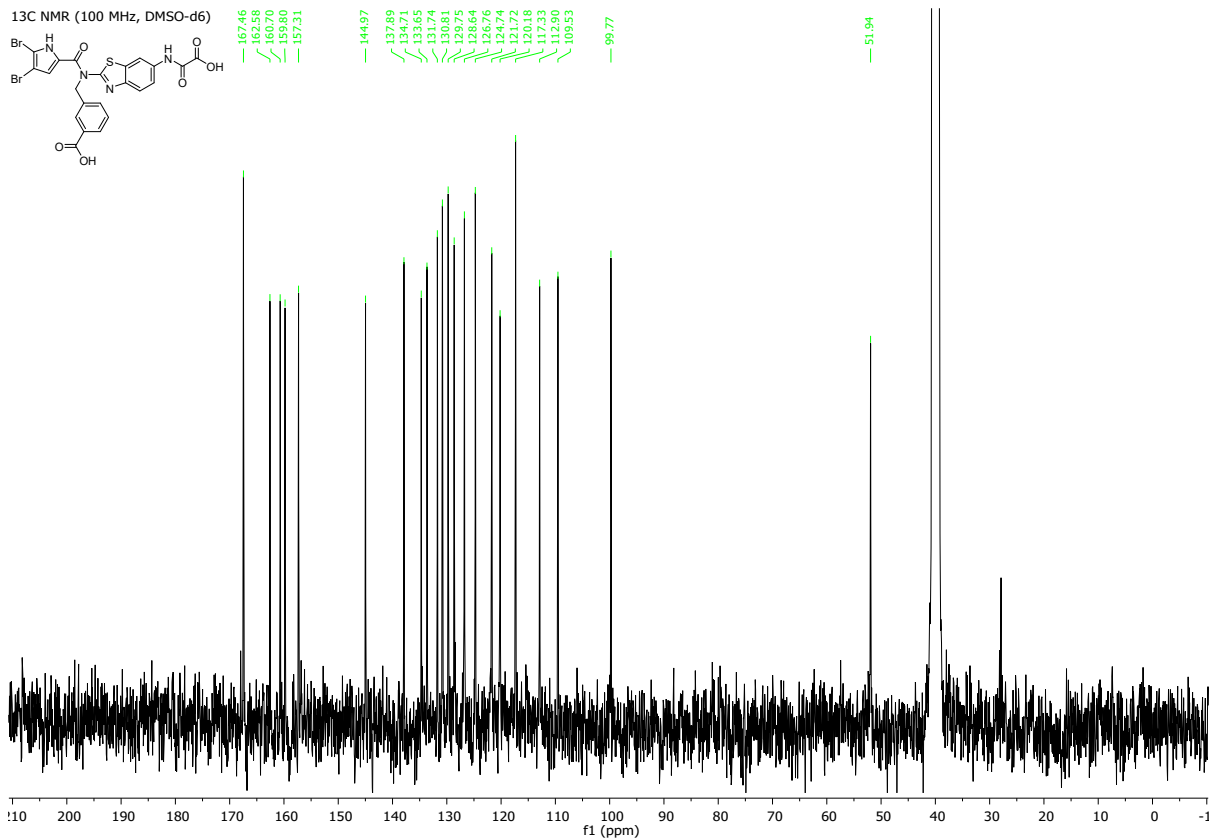

## HRMS spectra of the representative compounds

### 4,5-Dibromo-N-(6-nitrobenzo[d]thiazol-2-yl)-1H-pyrrole-2-carboxamide (6)

PP1-34

PP1-34 #67-101 RT: 0.30-0.45 AV: 35 NL: 1.30E8  
T: FTMS - c ESI Full ms [100.0000-750.0000]

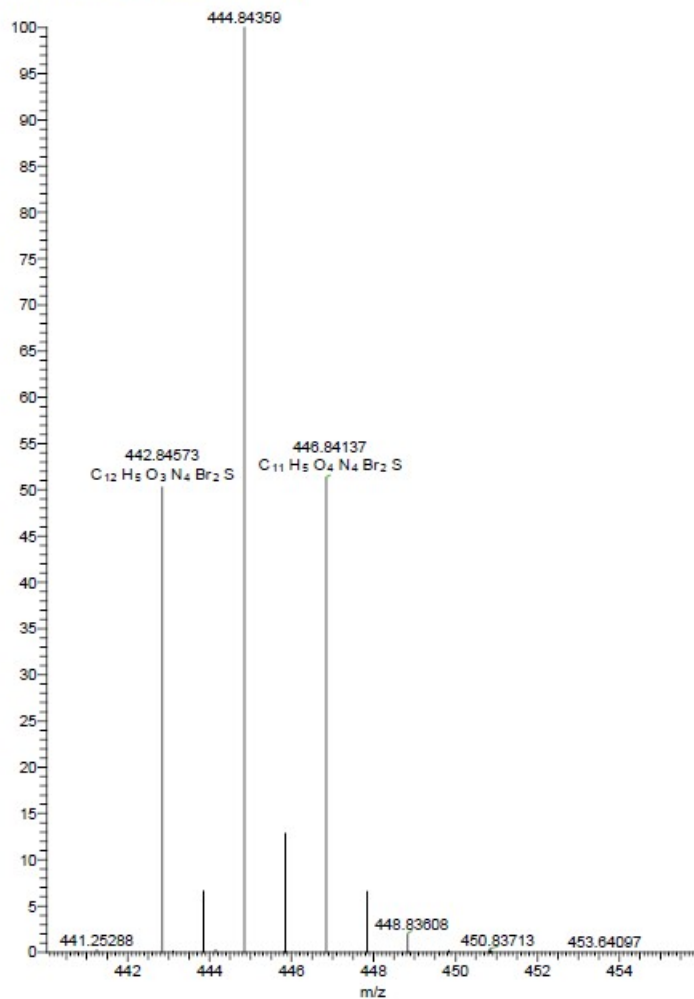

Elemental composition search on mass 442.84573

m/z= 437.84573-447.84573

| m/z       | Theo. Mass | Delta (ppm) | RDB equiv. | Composition                                                                    |
|-----------|------------|-------------|------------|--------------------------------------------------------------------------------|
| 442.84573 | 442.84546  | 0.61        | 11.5       | C <sub>12</sub> H <sub>5</sub> O <sub>3</sub> N <sub>4</sub> Br <sub>2</sub> S |

*(Z)*-N-(3-Benzyl-6-nitrobenzo[d]thiazol-2(3H)-ylidene)-4,5-dibromo-1H-pyrrole-2-carboxamide (**7**)

PP1-41-F1

PP1-41-F1 #120-133 RT: 0.53-0.59 AV: 14 NL: 5.44E4  
T: FTMS - e ESI Full ms [100.0000-750.0000]

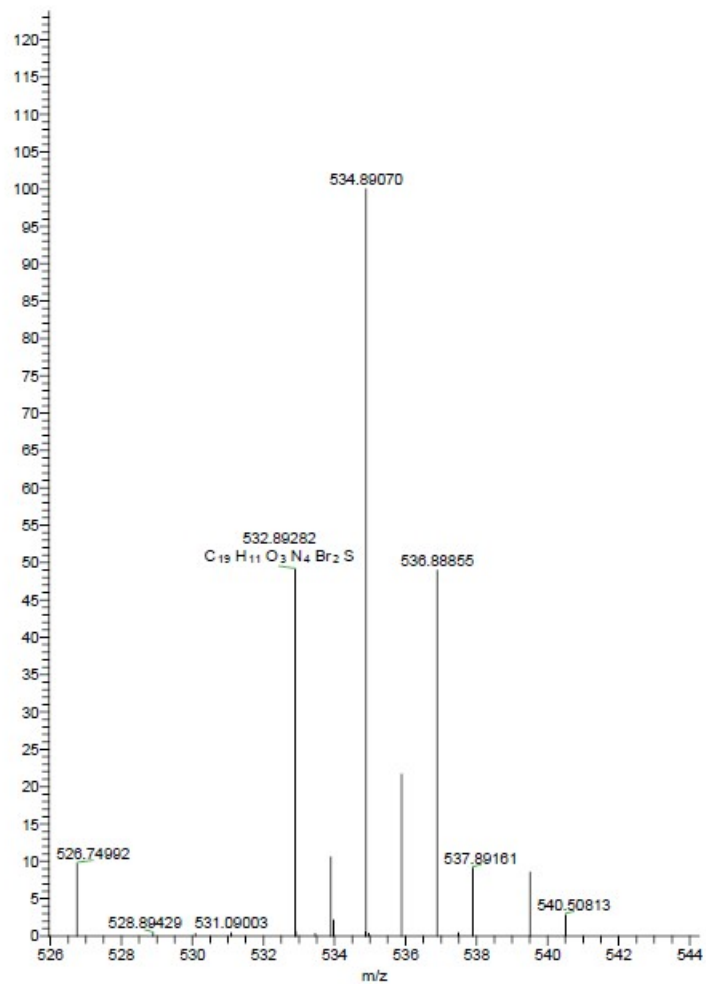

Elemental composition search on mass 532.89282

| m/z= 527.89282-537.89282 |            |             |            |                                                                                 |
|--------------------------|------------|-------------|------------|---------------------------------------------------------------------------------|
| m/z                      | Theo. Mass | Delta (ppm) | RDB equiv. | Composition                                                                     |
| 532.89282                | 532.89241  | 0.77        | 15.5       | C <sub>19</sub> H <sub>11</sub> O <sub>3</sub> N <sub>4</sub> Br <sub>2</sub> S |



*(Z)*-N-(6-Amino-3-benzylbenzo[d]thiazol-2(3H)-ylidene)-4,5-dibromo-1H-pyrrole-2-carboxamide (**8**)

PP1-47-F1

PP1-47-F1 #21-32 RT: 0.09-0.14 AV: 12 NL: 3.70E8  
T: FTMS + c ESI Full ms [100.0000-750.0000]

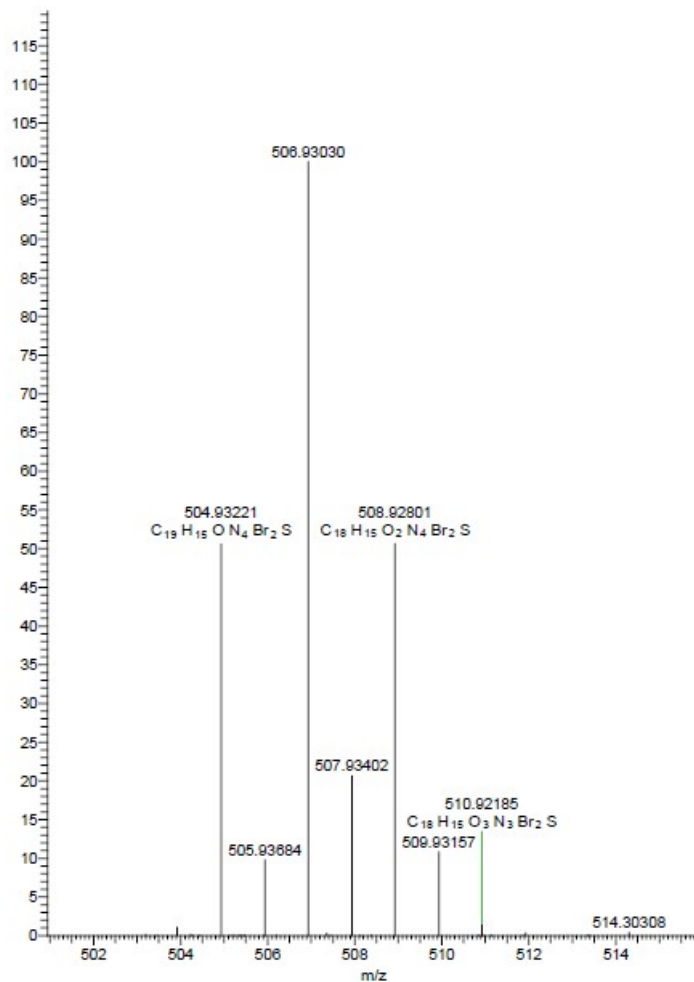

Elemental composition search on mass 504.93221

m/z= 499.93221-509.93221

| m/z       | Theo. Mass | Delta (ppm) | RDB equiv. | Composition                                                                     |
|-----------|------------|-------------|------------|---------------------------------------------------------------------------------|
| 504.93221 | 504.93278  | -1.14       | 12.5       | C <sub>19</sub> H <sub>15</sub> O <sub>4</sub> N <sub>4</sub> Br <sub>2</sub> S |

*tert*-Butyl(Z)-2-((3-benzyl-2-((4,5-dibromo-1H-pyrrole-2-carbonyl)imino)-2,3-dihydrobenzo[d]thiazol-6-yl)amino)-2-oxoacetate (**9**)

PP1-51-C3-F12

PP1-51\_C3-F12 #34-46 RT: 0.15-0.20 AV: 13 NL: 4.61E5  
T: FTMS + c ESI Full ms [100.0000-750.0000]

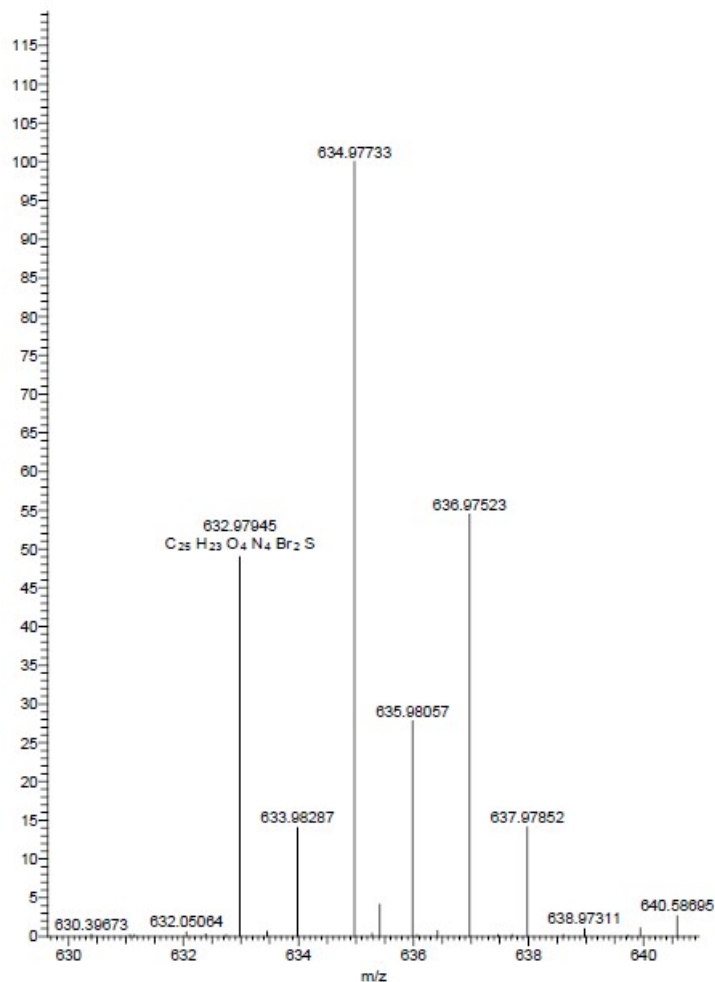

Elemental composition search on mass 632.97945

m/z = 627.97945-637.97945

| m/z       | Theo. Mass | Delta (ppm) | RDB equiv. | Composition                                                                     |
|-----------|------------|-------------|------------|---------------------------------------------------------------------------------|
| 632.97945 | 632.98013  | -1.07       | 15.5       | C <sub>25</sub> H <sub>23</sub> O <sub>4</sub> N <sub>4</sub> Br <sub>2</sub> S |

**(Z)-2-((3-Benzyl-2-((4,5-dibromo-1H-pyrrole-2-carbonyl)imino)-2,3-dihydrobenzo[d]thiazol-6-yl)amino)-2-oxoacetic acid (2)**

PPI-53 - v negative

PPI-53 #77-87 RT: 0.34-0.39 AV: 11 NL: 4.78E8  
T: FTMS - c ESI Full ms [100.0000-750.0000]

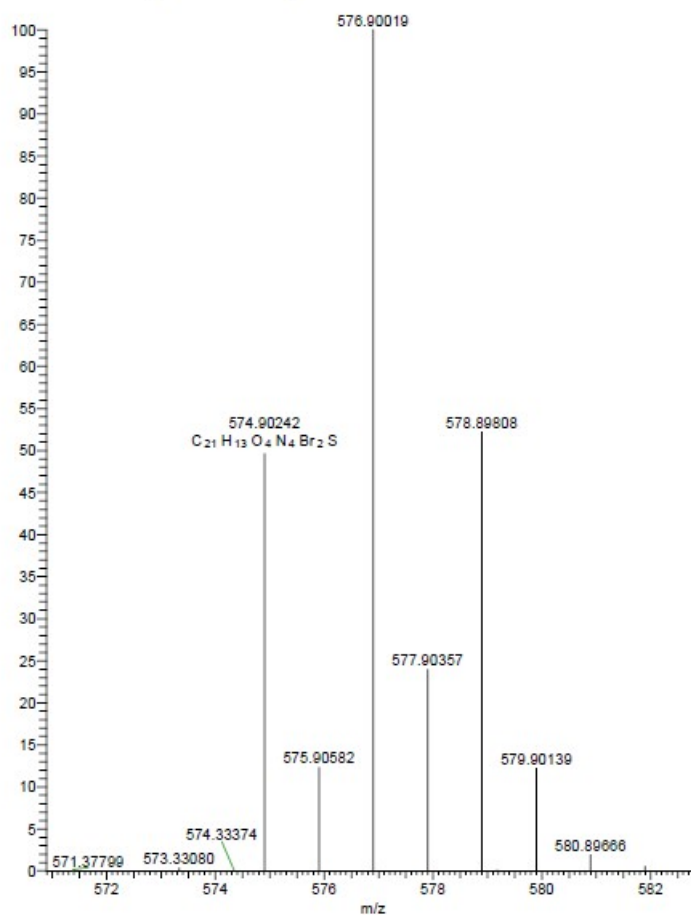

Elemental composition search on mass 574.90242

| m/z       | Theo. Mass | Delta (ppm) | RDB equiv. | Composition                                                                       |
|-----------|------------|-------------|------------|-----------------------------------------------------------------------------------|
| 574.90242 | 574.90297  | -0.96       | 16.5       | C <sub>21</sub> H <sub>13</sub> O <sub>4</sub> N <sub>4</sub> Br <sub>2</sub> S   |
|           | 574.90087  | 3.22        | 13.5       | C <sub>19</sub> H <sub>14</sub> O <sub>4</sub> N <sub>4</sub> Br <sub>2</sub> NaS |

# N-Benzyl-6-nitrobenzo[d]thiazol-2-amine (11a)

PP1-26-F1 - v negative

PP1-26-F1 #52-63 RT: 0.23-0.28 AV: 12 NL: 2.47E7  
T: FTMS - c ESI Full ms [100.0000-1000.0000]

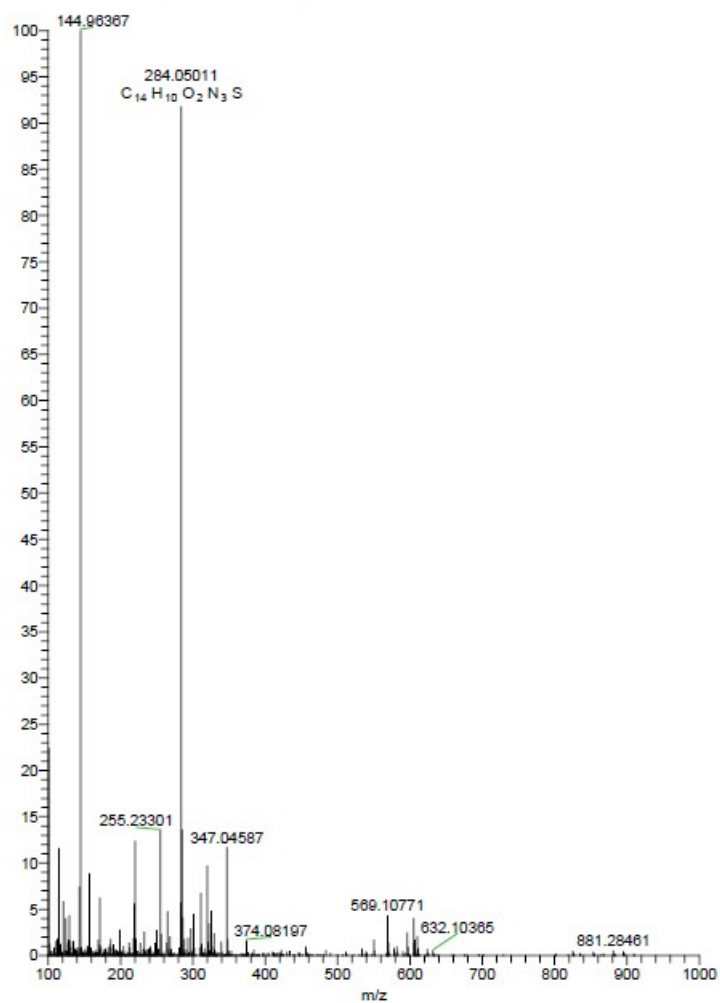

Elemental composition search on mass 284.05011

| m/z       | Theo. Mass | Delta (ppm) | RDB equiv. | Composition                                                     |
|-----------|------------|-------------|------------|-----------------------------------------------------------------|
| 284.05011 | 284.04992  | 0.67        | 11.5       | C <sub>14</sub> H <sub>10</sub> O <sub>2</sub> N <sub>3</sub> S |

*N*-Benzyl-4,5-dibromo-*N*-(6-nitrobenzo[d]thiazol-2-yl)-1*H*-pyrrole-2-carboxamide  
(12a)

PP1-32 - v negative

PP1-32 #66-71 RT: 0.29-0.32 AV: 6 NL: 2.44E6  
T: FTMS - c ESI Full ms [100.0000-750.0000]

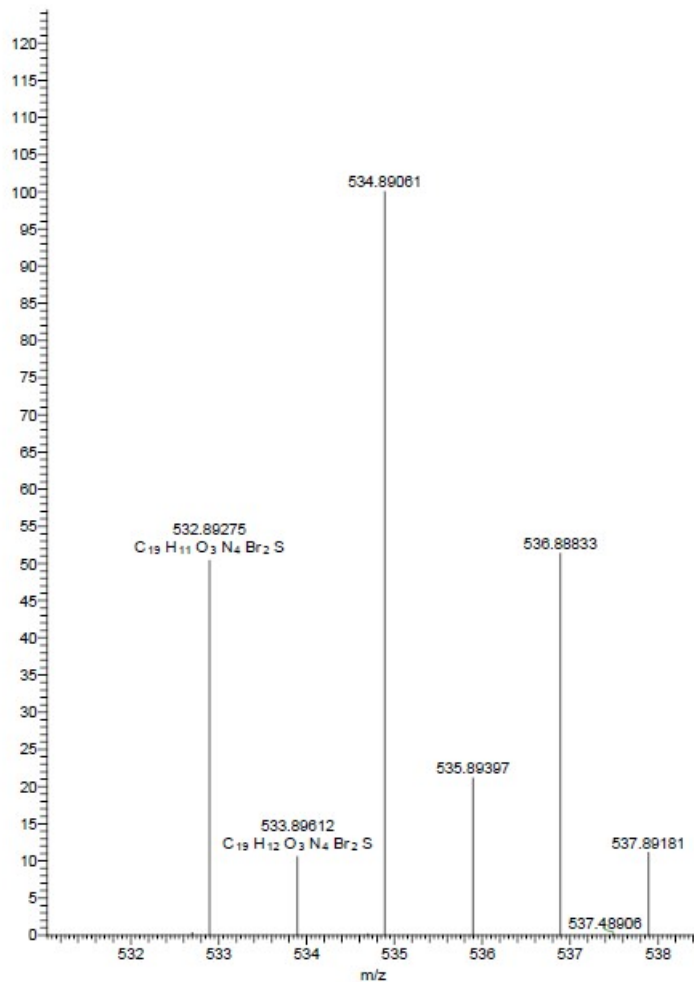

Elemental composition search on mass 532.89275

m/z = 527.89275-537.89275

| m/z       | Theo. Mass | Delta (ppm) | RDB equiv. | Composition                                                                     |
|-----------|------------|-------------|------------|---------------------------------------------------------------------------------|
| 532.89275 | 532.89241  | 0.64        | 15.5       | C <sub>19</sub> H <sub>11</sub> O <sub>3</sub> N <sub>4</sub> Br <sub>2</sub> S |

*N*-(6-Aminobenzo[d]thiazol-2-yl)-*N*-benzyl-4,5-dibromo-1*H*-pyrrole-2-carboxamide (**13a**)

PP1-33+PLC-F1 v negative  
 PP1-33 PLC-F1 #64 RT: 0.29 AV: 1 NL: 2.90E5  
 T: FTMS - c ESI Full ms [100.0000-750.0000]

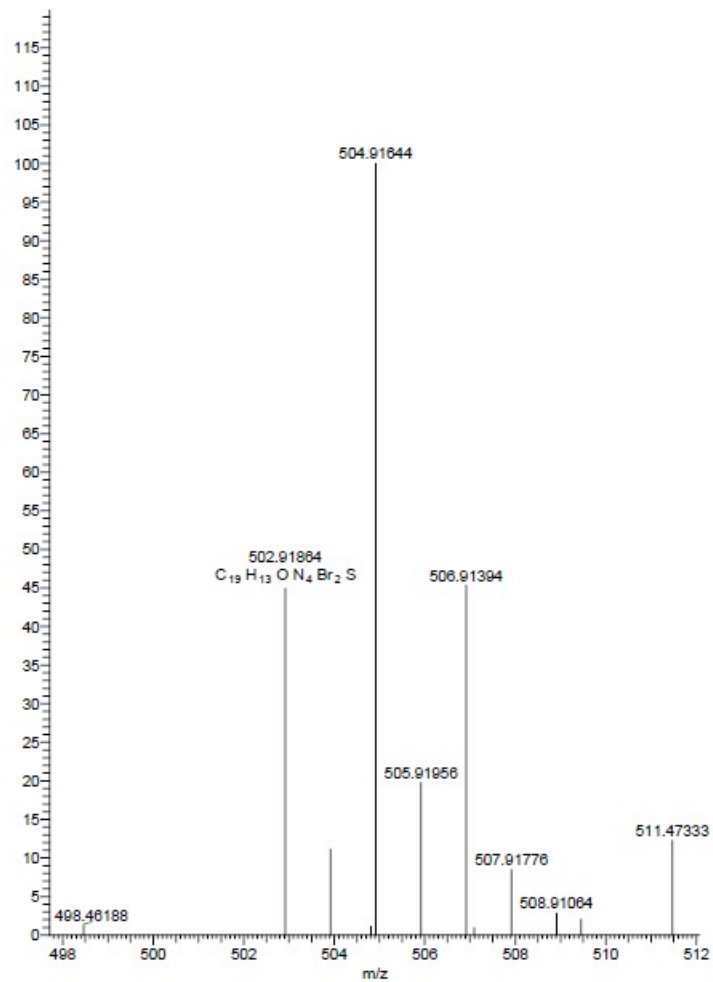

Elemental composition search on mass 502.91864

m/z= 497.91864-507.91864

| m/z       | Theo. Mass | Delta (ppm) | RDB equiv. | Composition                                                       |
|-----------|------------|-------------|------------|-------------------------------------------------------------------|
| 502.91864 | 502.91823  | 0.81        | 14.5       | C <sub>19</sub> H <sub>13</sub> ON <sub>4</sub> Br <sub>2</sub> S |

*tert*-Butyl-2-((2-(*N*-benzyl-4,5-dibromo-1*H*-pyrrole-2-carboxamido)benzo[*d*]thiazol-6-yl)amino)-2-oxoacetate (**14a**)

PP1-50-C2-F1

PP1-50-C2-F1#14-24 RT: 0.08-0.10 AV: 11 NL: 1.54E8  
T: FTMS + e ESI Full ms [100.0000-750.0000]

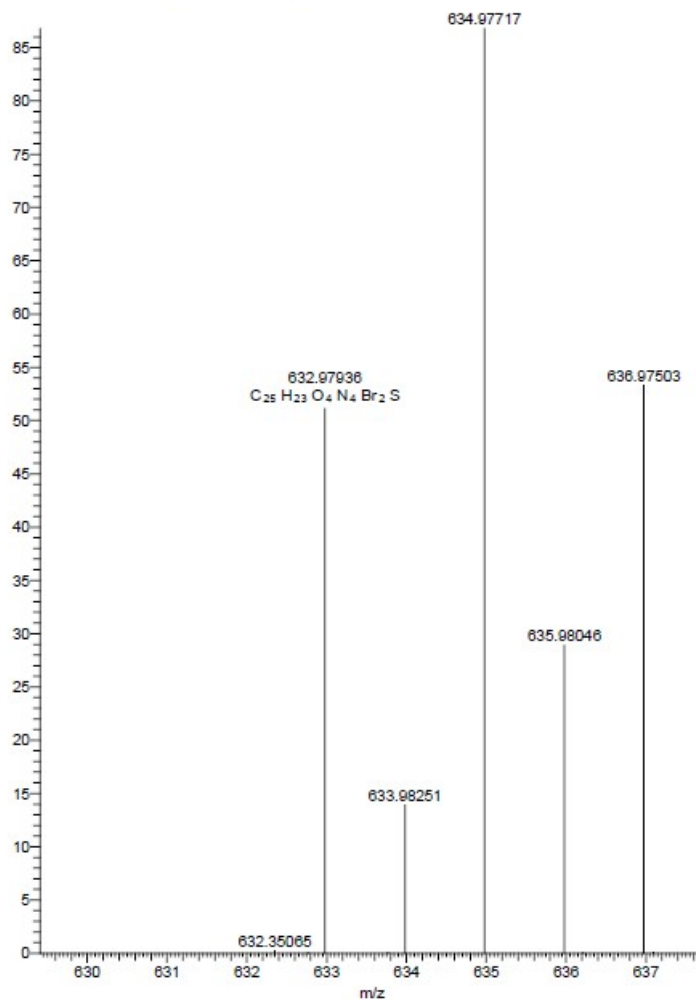

Elemental composition search on mass 632.97936

| m/z       | Theo. Mass | Delta (ppm) | RDB equiv. | Composition                                                                     |
|-----------|------------|-------------|------------|---------------------------------------------------------------------------------|
| 632.97936 | 632.98013  | -1.21       | 15.5       | C <sub>25</sub> H <sub>23</sub> O <sub>4</sub> N <sub>4</sub> Br <sub>2</sub> S |

2-((2-(N-Benzyl-4,5-dibromo-1H-pyrrole-2-carboxamido)benzo[d]thiazol-6-yl)amino)-2-oxoacetic acid (3)

V negative

PPI-S4 #65-70 RT: 0.29-0.31 AV: 6 NL: 1.90E7  
T: FTMS - c ESI Full ms [100.0000-750.0000]

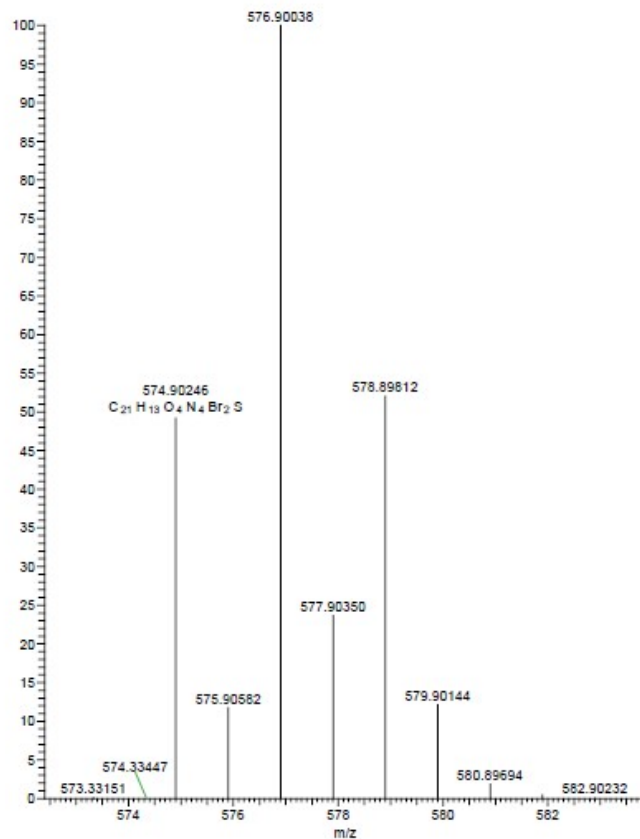

Elemental composition search on mass 574.90246

m/z = 569.90246-579.90246

| m/z       | Theo. Mass | Delta (ppm) | RDB equiv. | Composition                                                                       |
|-----------|------------|-------------|------------|-----------------------------------------------------------------------------------|
| 574.90246 | 574.90297  | -0.89       | 16.5       | C <sub>21</sub> H <sub>13</sub> O <sub>4</sub> N <sub>4</sub> Br <sub>2</sub> S   |
|           | 574.90087  | 3.29        | 13.5       | C <sub>19</sub> H <sub>14</sub> O <sub>4</sub> N <sub>4</sub> Br <sub>2</sub> NaS |



*tert*-Butyl 3-(((6-nitrobenzo[d]thiazol-2-yl)amino)methyl)benzoate (**11b**)

PP1-84-F1

PP1-84-F1 #28-41 RT: 0.12-0.18 AV: 14 NL: 5.54E6  
T: FTMS + c ESI Full ms [100.0000-750.0000]

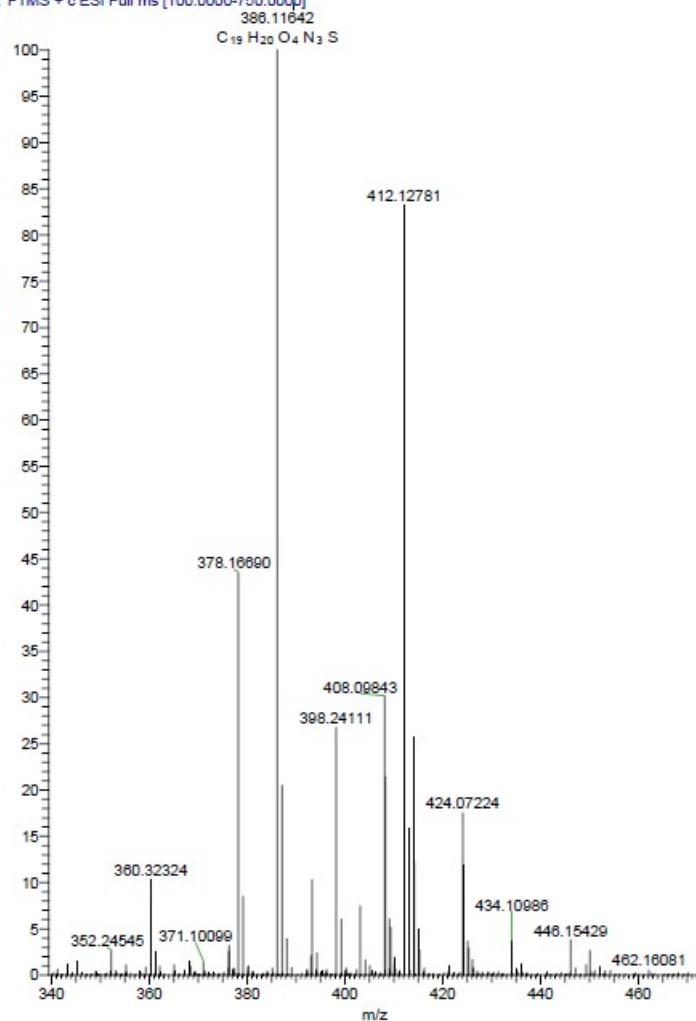

Elemental composition search on mass 386.11642

| m/z       | Theo. Mass | Delta (ppm) | RDB equiv. | Composition                                                     |
|-----------|------------|-------------|------------|-----------------------------------------------------------------|
| 386.11642 | 386.11690  | -1.25       | 11.5       | C <sub>19</sub> H <sub>20</sub> O <sub>4</sub> N <sub>3</sub> S |

*tert*-Butyl 3-((4,5-dibromo-N-(6-nitrobenzo[d]thiazol-2-yl)-1H-pyrrole-2-carboxamido)methyl)benzoate (**12b**)

PP1-86-2

PP1-86-2 #90-102 RT: 0.40-0.45 AV: 13 NL: 2.13E8  
T: FTMS - c ESI Full ms [100.0000-750.0000]

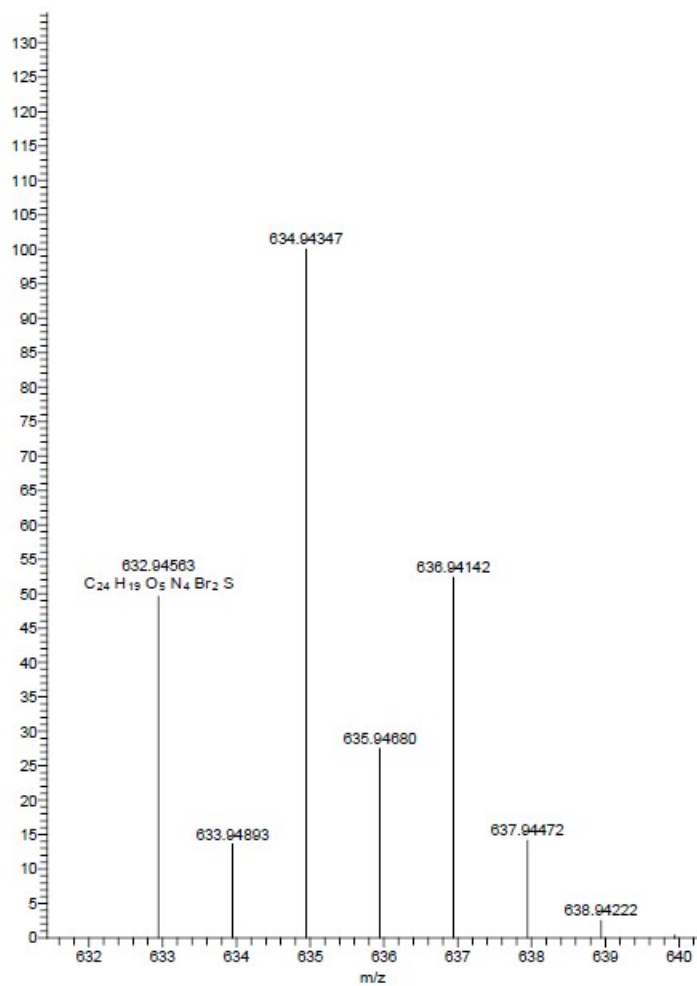

Elemental composition search on mass 632.94563

m/z= 627.94563-637.94563

| m/z       | Theo. Mass | Delta (ppm) | RDB equiv. | Composition                                                                     |
|-----------|------------|-------------|------------|---------------------------------------------------------------------------------|
| 632.94563 | 632.94484  | 1.25        | 16.5       | C <sub>24</sub> H <sub>19</sub> O <sub>5</sub> N <sub>4</sub> Br <sub>2</sub> S |

*tert*-Butyl 3-((*N*-(6-aminobenzo[*d*]thiazol-2-yl)-4,5-dibromo-1*H*-pyrrole-2-carboxamido)methyl)benzoate (**13b**)

PP1-105-2

PP1-105-2 #17-29 RT: 0.07-0.13 AV: 13 NL: 1.00E7  
T: FTMS + c ESI Full ms [100.0000-750.0000]

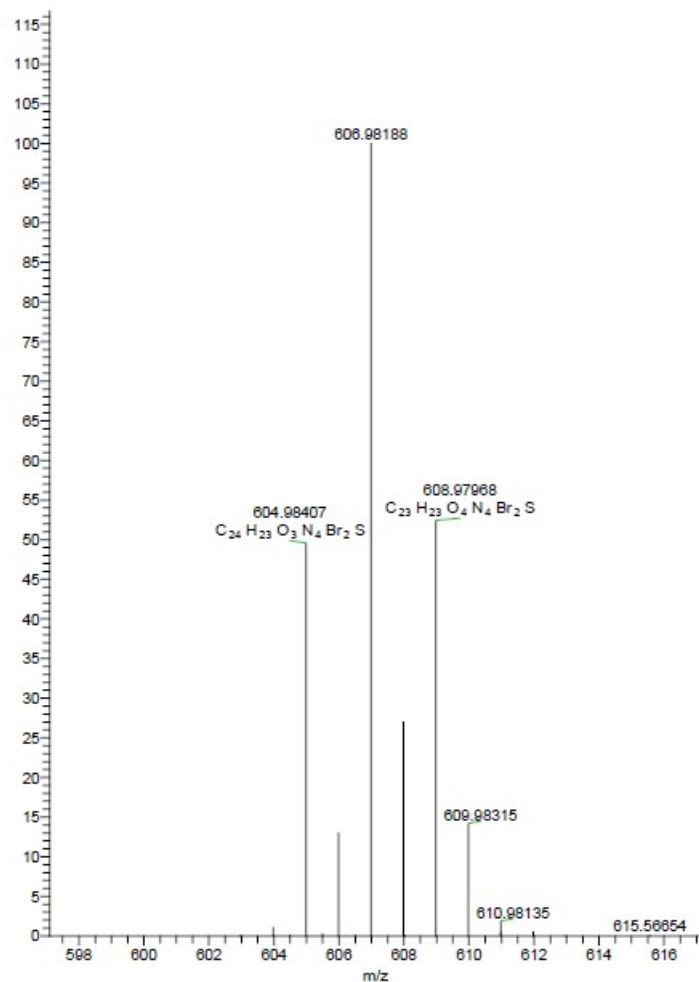

Elemental composition search on mass 604.98407

m/z= 599.98407-609.98407

| m/z       | Theo. Mass | Delta (ppm) | RDB equiv. | Composition                                                                     |
|-----------|------------|-------------|------------|---------------------------------------------------------------------------------|
| 604.98407 | 604.98521  | -1.89       | 14.5       | C <sub>24</sub> H <sub>23</sub> O <sub>3</sub> N <sub>4</sub> Br <sub>2</sub> S |

*tert*-Butyl 3-((4,5-dibromo-N-(6-(2-(*tert*-butoxy)-2-oxoacetamido)benzo[d]thiazol-2-yl)-1H-pyrrole-2-carboxamido)methyl)benzoate (**14b**)

PP1-107-F1

PP1-107-F1 #31-38 RT: 0.14-0.17 AV: 8 NL: 6.94E5  
T: FTMS + c ESI Full ms [100.0000-750.0000]

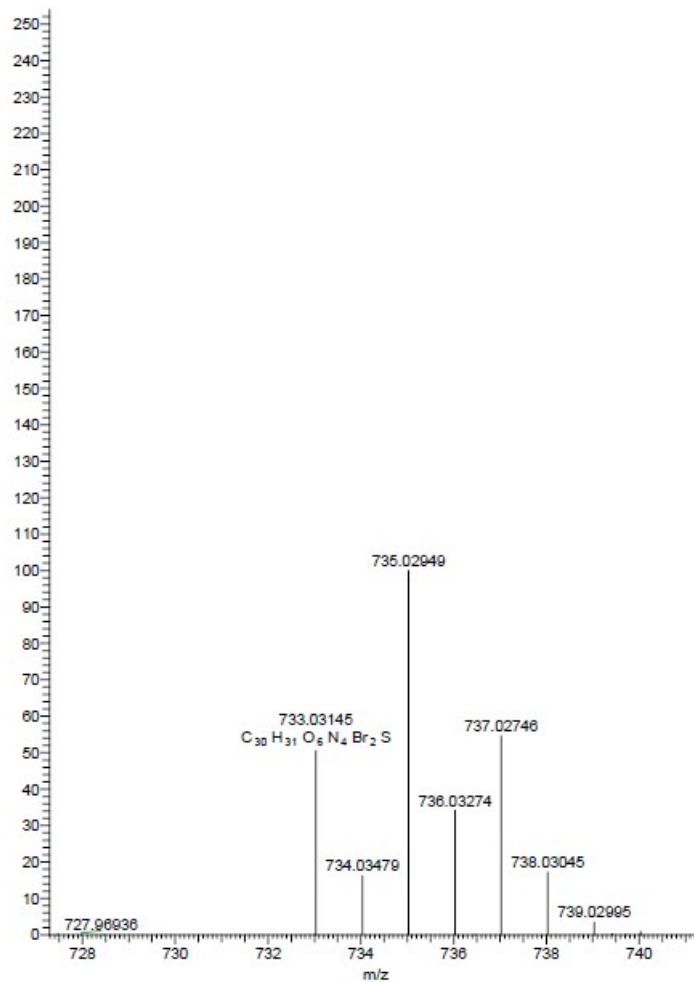

Elemental composition search on mass 733.03145

m/z = 728.03145-738.03145

| m/z       | Theo. Mass | Delta (ppm) | RDB equiv. | Composition                                                                     |
|-----------|------------|-------------|------------|---------------------------------------------------------------------------------|
| 733.03145 | 733.03256  | -1.51       | 16.5       | C <sub>30</sub> H <sub>31</sub> O <sub>6</sub> N <sub>4</sub> Br <sub>2</sub> S |

3-((4,5-Dibromo-N-(6-(carboxyformamido)benzo[d]thiazol-2-yl)-1H-pyrrole-2-carboxamido)methyl)benzoic acid (**4**)

PPI-109-3

PPI-109-3 #56-06 RT: 0.25-0.29 AV: 11 NL: 4.66E6  
T: FTMS - c ESI Full ms [100.0000-1000.0000]

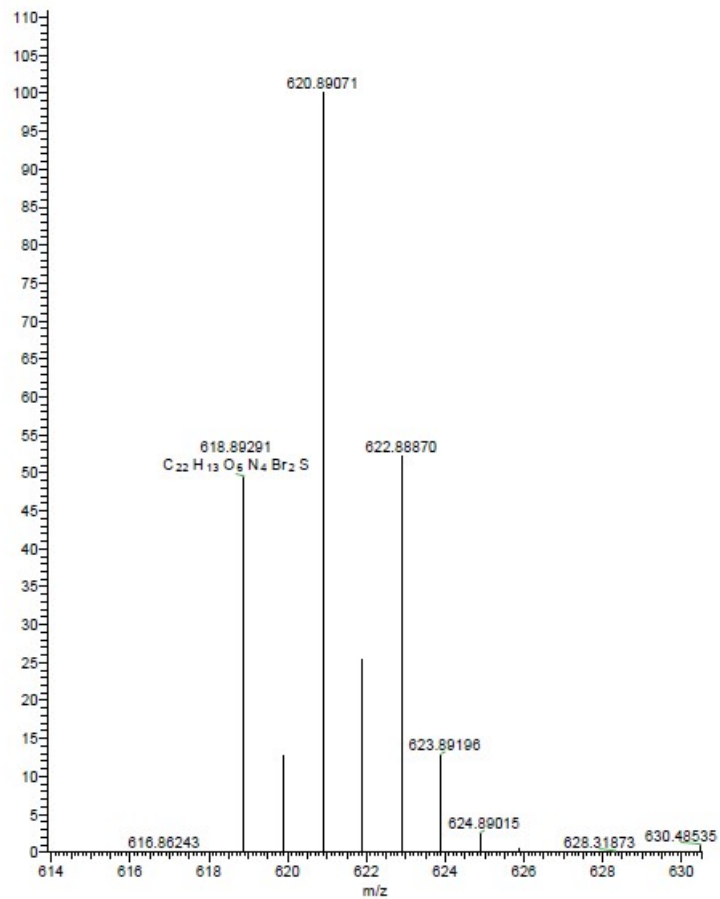

Elemental composition search on mass 618.89291

| m/z       | Theo. Mass | Delta (ppm) | RDB equiv. | Composition                                                                       |
|-----------|------------|-------------|------------|-----------------------------------------------------------------------------------|
| 618.89291 | 618.89280  | 0.17        | 17.5       | C <sub>22</sub> H <sub>13</sub> O <sub>6</sub> N <sub>4</sub> Br <sub>2</sub> S   |
|           | 618.89040  | 4.06        | 14.5       | C <sub>20</sub> H <sub>14</sub> O <sub>6</sub> N <sub>4</sub> Br <sub>2</sub> NaS |

## HPLC chromatograms of the final compounds

(Z)-2-((3-Benzyl-2-((4,5-dibromo-1H-pyrrole-2-carbonyl)imino)-2,3-dihydrobenzo[d]thiazol-6-yl)amino)-2-oxoacetic acid (**2**)

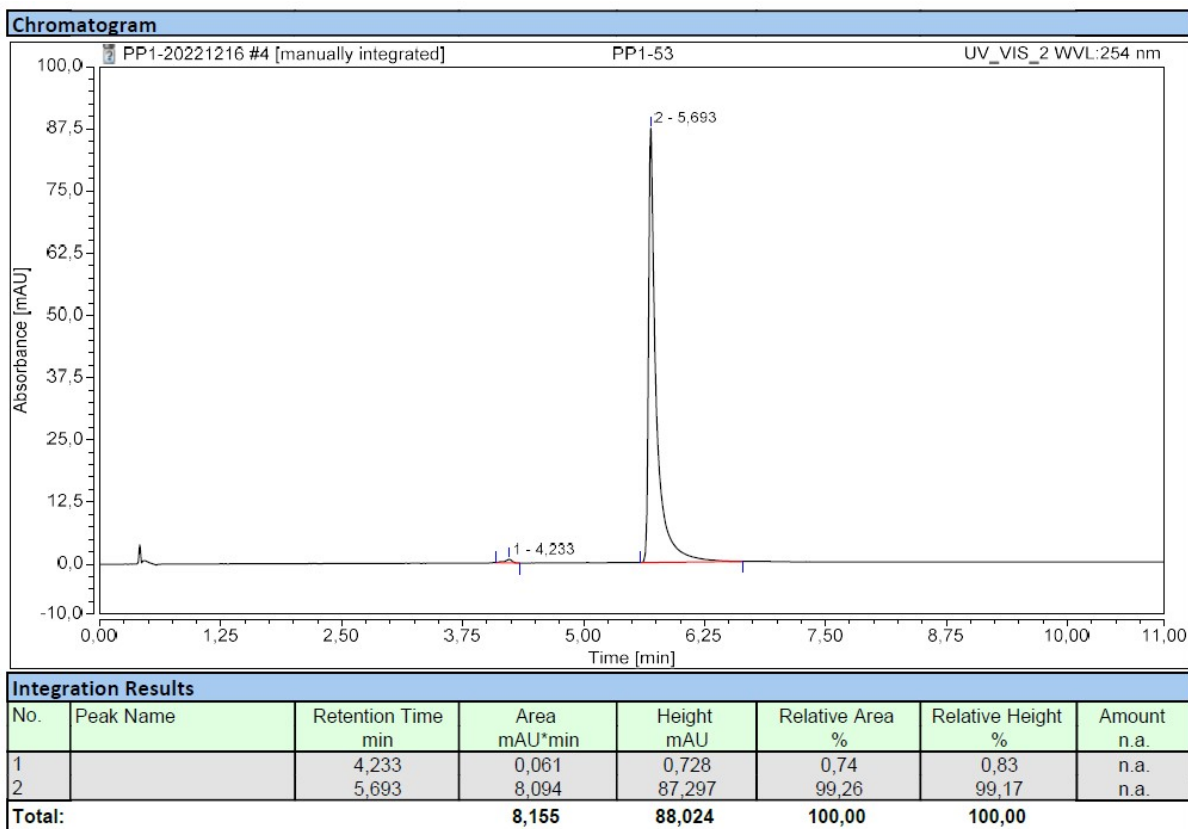

2-((2-(N-Benzyl-4,5-dibromo-1H-pyrrole-2-carboxamido)benzo[d]thiazol-6-yl)amino)-2-oxoacetic acid (**3**)

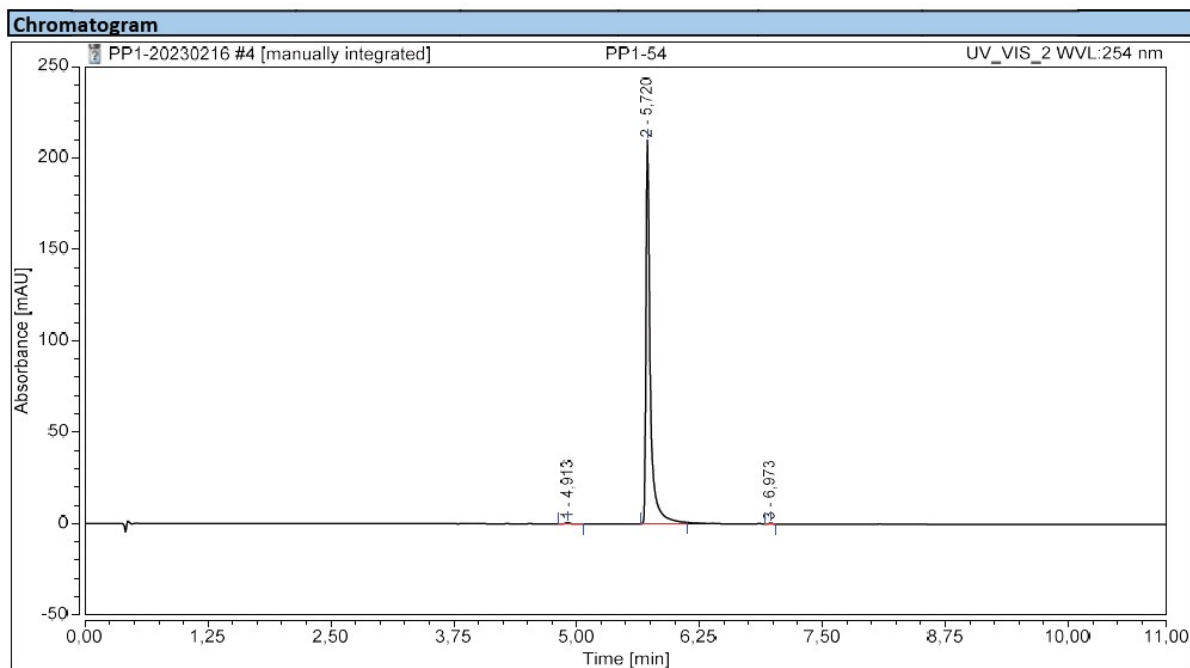

**Integration Results**

| No.           | Peak Name | Retention Time<br>min | Area<br>mAU*min | Height<br>mAU  | Relative Area<br>% | Relative Height<br>% | Amount<br>n.a. |
|---------------|-----------|-----------------------|-----------------|----------------|--------------------|----------------------|----------------|
| 1             |           | 4,913                 | 0,036           | 0,705          | 0,33               | 0,33                 | n.a.           |
| 2             |           | 5,720                 | 10,839          | 209,932        | 99,53              | 99,46                | n.a.           |
| 3             |           | 6,973                 | 0,015           | 0,428          | 0,14               | 0,20                 | n.a.           |
| <b>Total:</b> |           |                       | <b>10,891</b>   | <b>211,065</b> | <b>100,00</b>      | <b>100,00</b>        |                |

3-((4,5-Dibromo-N-(6-(carboxyformamido)benzo[d]thiazol-2-yl)-1H-pyrrole-2-carboxamido)methyl)benzoic acid (**4**)

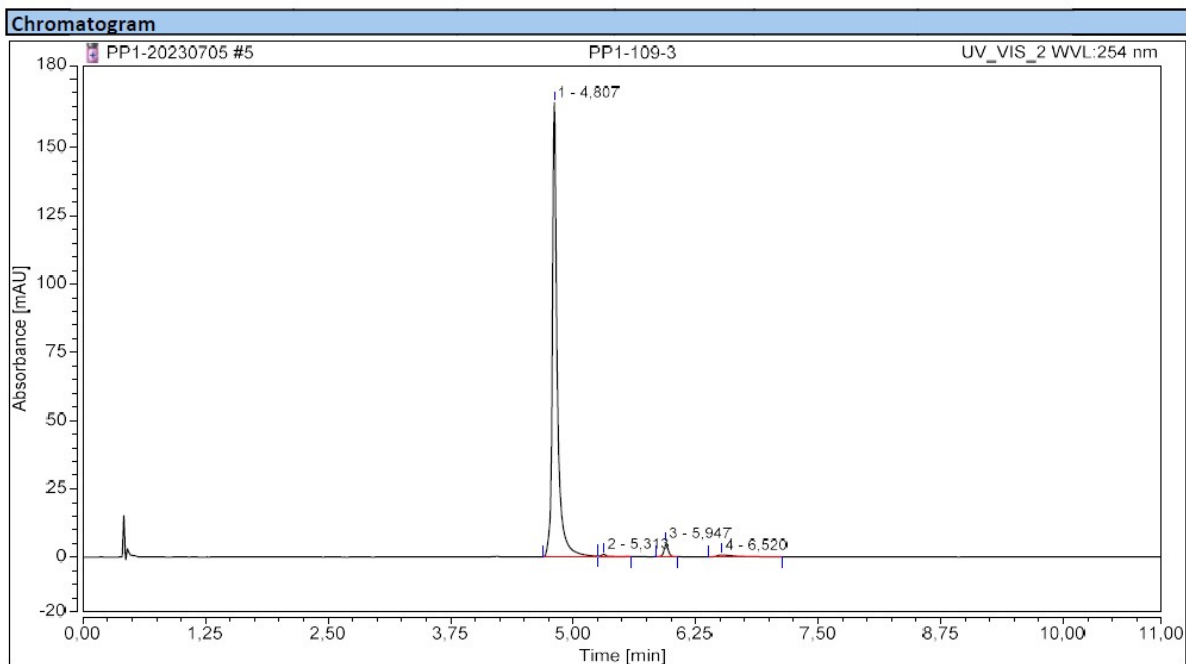

**Integration Results**

| No.           | Peak Name | Retention Time<br>min | Area<br>mAU*min | Height<br>mAU  | Relative Area<br>% | Relative Height<br>% | Amount<br>n.a. |
|---------------|-----------|-----------------------|-----------------|----------------|--------------------|----------------------|----------------|
| 1             |           | 4,807                 | 9,905           | 166,438        | 95,40              | 96,13                | n.a.           |
| 2             |           | 5,313                 | 0,072           | 1,002          | 0,69               | 0,58                 | n.a.           |
| 3             |           | 5,947                 | 0,241           | 4,974          | 2,32               | 2,87                 | n.a.           |
| 4             |           | 6,520                 | 0,165           | 0,732          | 1,59               | 0,42                 | n.a.           |
| <b>Total:</b> |           |                       | <b>10,382</b>   | <b>173,146</b> | <b>100,00</b>      | <b>100,00</b>        |                |
